# Supplementary material
Source: publisher figshare collection journal article supplement (https://acs.figshare.com/ndownloader/files/4293094)
Supplement: Supplementary file 1 [file 4293094]

# Direct Aldol Reactions Catalyzed by a Heterogeneous Guanidinium Salt/Proline System under Solvent-Free Conditions

Ángel Martínez-Castañeda, Belén Poladura, Humberto  
Rodríguez-Solla, Carmen Concellón,<sup>\*[a]</sup> and Vicente del  
Amo<sup>\*[a]</sup>

*Universidad de Oviedo, Facultad de Química, C/ Julian Clavería 8, 33006,  
Oviedo, Spain*

[ccf@uniovi.es](mailto:ccf@uniovi.es), [vdelamo@uniovi.es](mailto:vdelamo@uniovi.es)

## SUPPORTING INFORMATION

|                                                                                                               |    |
|---------------------------------------------------------------------------------------------------------------|----|
| General.....                                                                                                  | 2  |
| Preparation of guanidinium salts <b>1a-e</b> .....                                                            | 3  |
| Standard procedure for the synthesis of aldols.....                                                           | 10 |
| ( <i>S</i> )-2-(( <i>R</i> )-hydroxy(4-chlorophenyl)methyl)cyclohexan-1-one <b>4a</b> .....                   | 11 |
| ( <i>S</i> )-2-(( <i>R</i> )-hydroxy(4-nitrophenyl)methyl)cyclohexan-1-one <b>4b</b> .....                    | 13 |
| ( <i>S</i> )-2-(( <i>R</i> )-hydroxy(4-methoxycarbonylphenyl)methyl)cyclohexan-1-one <b>4c</b> .....          | 15 |
| ( <i>S</i> )-2-(( <i>R</i> )-hydroxy(4-bromophenyl)methyl)cyclohexan-1-one <b>4d</b> .....                    | 17 |
| ( <i>S</i> )-2-(( <i>R</i> )-hydroxy(2-methoxyphenyl)methyl)cyclohexan-1-one <b>4e</b> .....                  | 19 |
| ( <i>S</i> )-2-(( <i>R</i> )-hydroxy(3-chlorophenyl)methyl)cyclohexan-1-one <b>4f</b> .....                   | 21 |
| ( <i>S</i> )-2-(( <i>R</i> )-hydroxy(2-furyl)methyl)cyclohexan-1-one <b>4g</b> .....                          | 23 |
| ( <i>S</i> )-2-(( <i>R</i> )-hydroxy(2-thiophenyl)methyl)cyclohexan-1-one <b>4h</b> .....                     | 25 |
| ((2 <i>S</i> ,4 <i>S</i> )-2-(( <i>R</i> )-hydroxy(4-nitrophenyl)methyl)-4-methylcyclohexanone <b>5</b> ..... | 27 |
| ( <i>S</i> )-2-(( <i>R</i> )-hydroxy(4-nitrophenyl)methyl)cyclopentan-1-one <b>6</b> .....                    | 29 |
| ( <i>R</i> )-4-hydroxy-4-(4-nitrophenyl)butan-2-one <b>7</b> .....                                            | 31 |
| Direct aldol reaction without addition of guanidinium salt <b>1a</b> .....                                    | 33 |

## General

All commercially available reagents and solvents were used without further purification unless otherwise stated. Liquid aldehydes, and ketones, were in all cases distilled under reduced pressure before use. Flash chromatography of reaction products was carried out using Silica 60A, particle size 230-400 micron (Merk). Analytical thin layer chromatography (TLC) was performed on DC-Alufolien Kieselgel 60F<sub>254</sub> 0.2 mm plates (Merk) and compounds were visualised by UV fluorescence or 5% phosphomolybdic acid in methanol. <sup>1</sup>H NMR, <sup>13</sup>C NMR and <sup>19</sup>F NMR spectra were recorded on a Bruker AC-300 or a Bruker DPX-300 spectrometer, using deuterated solvents and were referenced internally to the residual solvent peak ( $\delta_{\text{H}} = 7.26$  ppm,  $\delta_{\text{C}} = 77.36$  ppm) signal,<sup>i</sup> or to CFC<sub>l</sub><sub>3</sub> ( $\delta_{\text{F}} = 0.00$  ppm) for <sup>19</sup>F spectra. Coupling constants (*J*-values) are given in hertz (Hz). The DEPT 135 technique was used to assign methylene (CH<sub>2</sub>) signals. Chemical shifts are reported as follows: value (number of protons, description of absorption, coupling constant(s) where applicable, assignment). NMR spectra assignation was aided by comparison with literature values for similar compounds. In this experimental section only clear identifiable peaks are assigned.

## Preparation of guanidinium salts 1a-e

### Tetrafluoroborate guanidinium salt (1a)

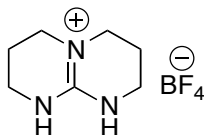

Triazabicyclo[4.4.0]dec-5-ene (300 mg, 2.16 mmol) was dissolved in methanol (5 mL) and the solution was cooled to 0 °C before HBF<sub>4</sub> (48% wt. in water, 0.28 mL, 2.16 mmol) was added dropwise. The reaction mixture was vigorously stirred 30 min. before the solvent and volatiles were evacuated under reduced pressure (high vacuum pump) to render salt **1a** (490 mg, quantitative yield) as a colourless oil (ionic liquid). <sup>1</sup>H NMR (DMSO-*d*<sub>6</sub>, 300 MHz)  $\delta_{\text{H}}$  = 7.23 (2H, s, 2 x NH), 3.12 (4H, t, *J* = 6.0 Hz, 2 x CH<sub>2</sub>), 3.05-3.00 (4H, m, 2 x CH<sub>2</sub>), 1.72 (4H, quint., *J* = 6.0 Hz, 2 x CH<sub>2</sub>); <sup>13</sup>C NMR (DMSO-*d*<sub>6</sub>, 75 MHz)  $\delta_{\text{C}}$  = 151.6 (CN<sub>3</sub>), 47.3 (CH<sub>2</sub>), 38.7 (CH<sub>2</sub>), 21.3 (CH<sub>2</sub>); <sup>19</sup>F NMR (DMSO-*d*<sub>6</sub>, 282 MHz)  $\delta_{\text{F}}$  = -148.31 (BF<sub>4</sub>); MS (ESI<sup>+</sup>): *m/z* (%) = 140 (100) [TBD+H]<sup>+</sup>.

<sup>13</sup>C

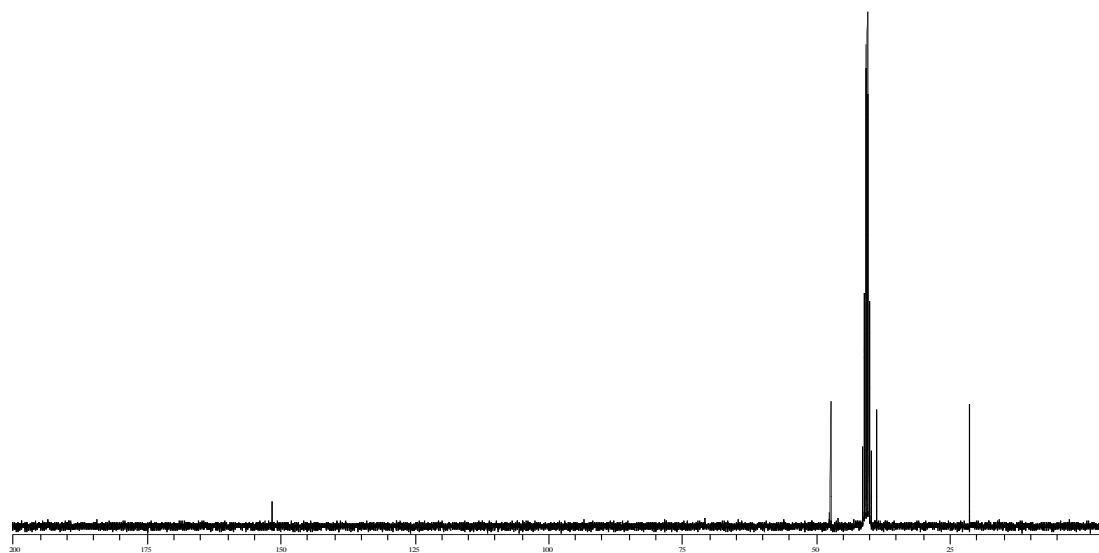

$^1\text{H}$

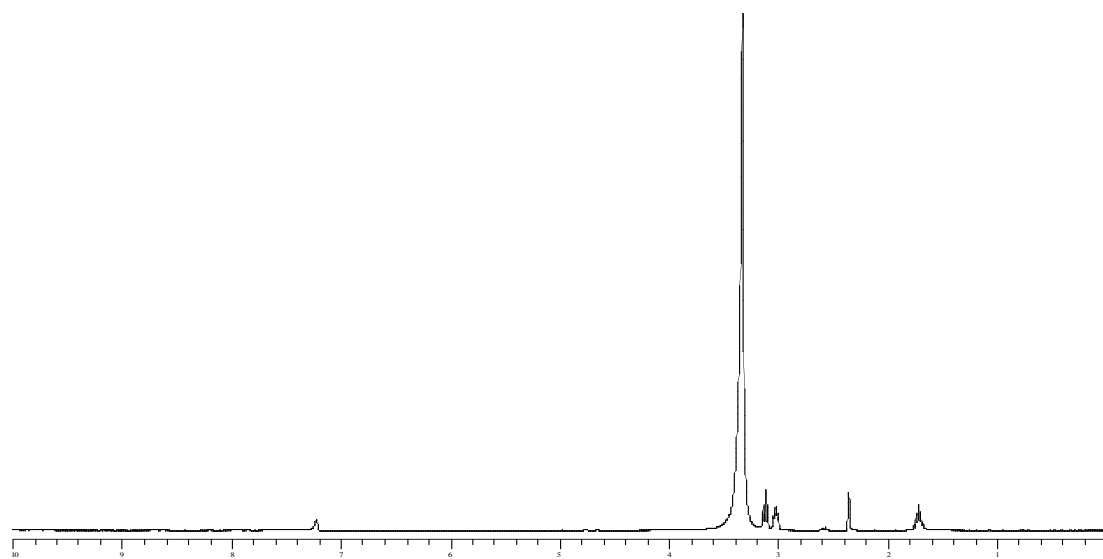

$^{19}\text{F}$

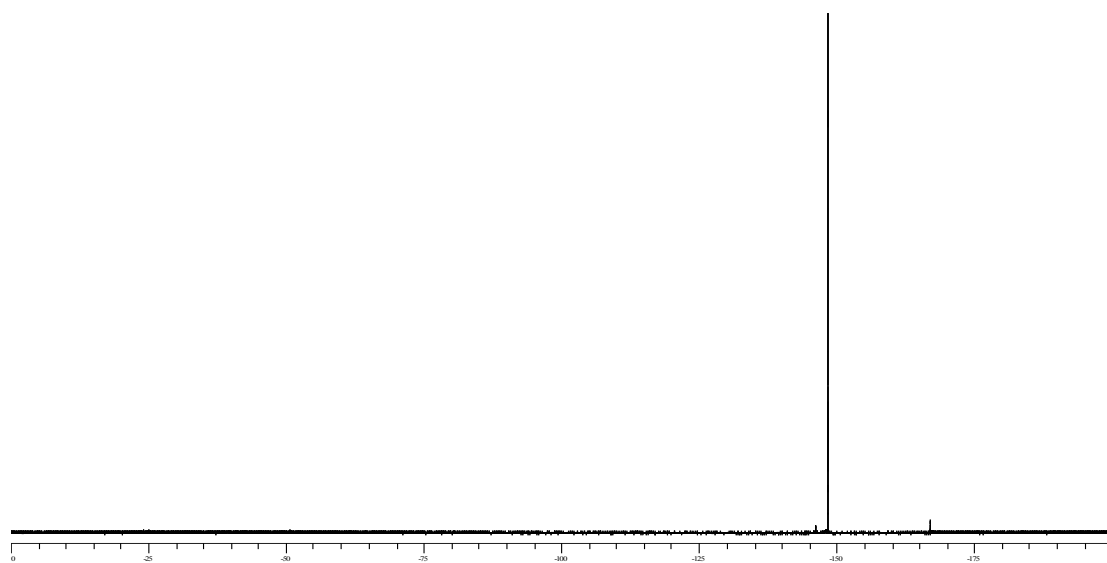

SI\_4

### Hexafluorophosphate guanidinium salt (**1c**)

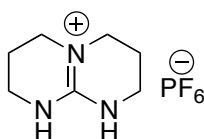

A solution of NaPF<sub>6</sub> (134 mg, 0.80 mmol) and chloride guanidinium salt **1e** (126 mg, 0.72 mmol), in deionised water (10 mL), was poured into 15 mL of CH<sub>2</sub>Cl<sub>2</sub> and the resulting mixture was vigorously stirred for 1 h. The aqueous layer was carefully discarded and the organic phase was extensively dried under reduced pressure to render hexafluorophosphate **1c** (189 mg, 92%) as a white solid. Melting point = 68-69 °C; <sup>1</sup>H NMR (DMSO-*d*<sub>6</sub>, 300 MHz) δ<sub>H</sub> = 7.37 (2H, s, 2 x NH), 3.17 (4H, t, *J* = 6.0 Hz, 2 x CH<sub>2</sub>), 3.07 (4H, m, 2 x CH<sub>2</sub>), 1.77 (4H, quint., *J* = 5.8 Hz, 2 x CH<sub>2</sub>); <sup>13</sup>C NMR (DMSO-*d*<sub>6</sub>, 75 MHz) δ<sub>C</sub> = 151.5 (CN<sub>3</sub>), 47.3 (CH<sub>2</sub>), 38.6 (CH<sub>2</sub>), 21.3 (CH<sub>2</sub>); <sup>19</sup>F NMR (DMSO-*d*<sub>6</sub>, 282 MHz) δ<sub>F</sub> = -65.4 (d, <sup>1</sup>*J*<sub>P-F</sub> = 711 Hz, PF<sub>6</sub>); MS (ESI<sup>+</sup>): *m/z* (%) = 140 (100) [TBD+H]<sup>+</sup>.

<sup>13</sup>C

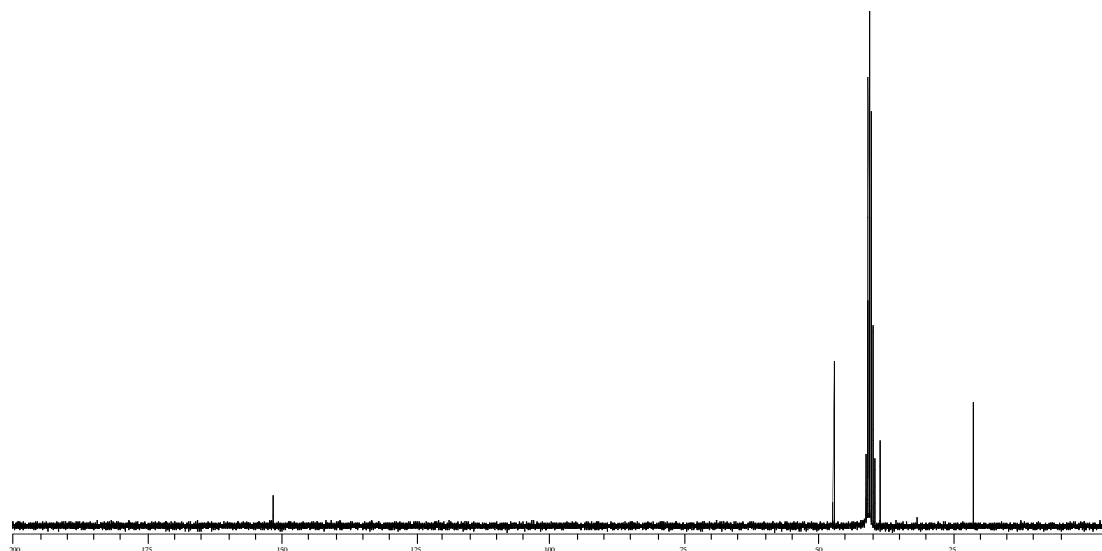

**$^1\text{H}$**

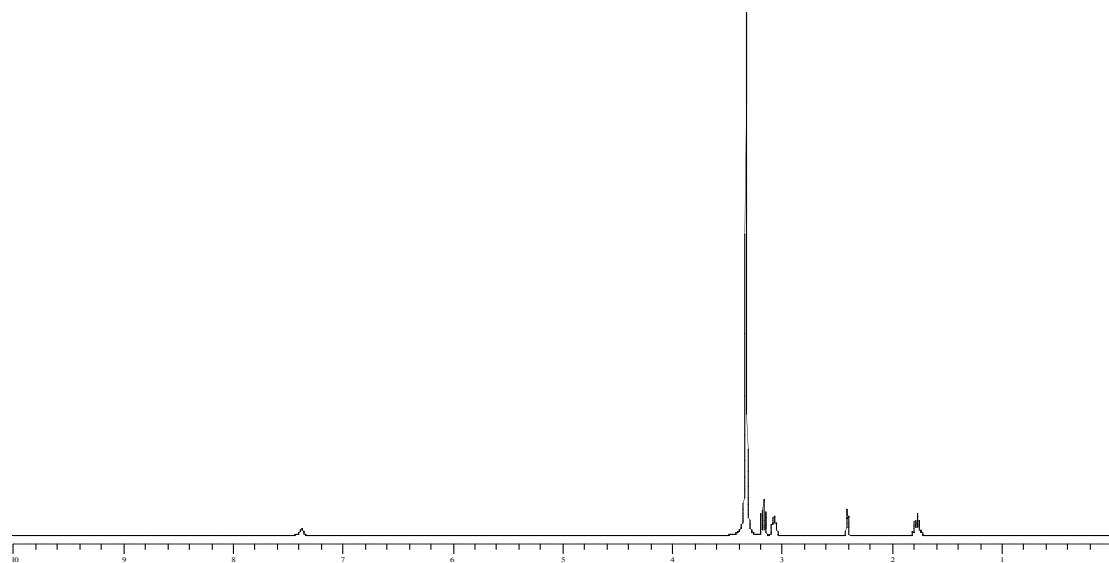

**$^{19}\text{F}$**

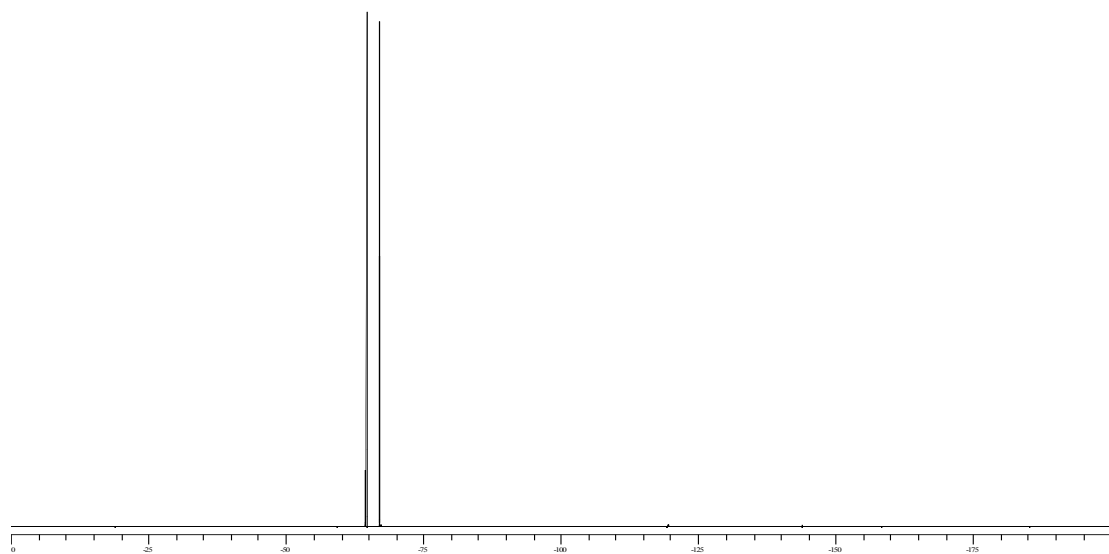

SI\_6

### Trifluoroacetate guanidinium salt (**1d**)

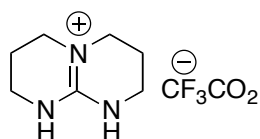

Trifluoroacetic acid (92 mg, 60  $\mu$ L, 0.81 mmol) was added dropwise to a suspension of triazabicyclo[4.4.0]dec-5-ene (70 mg, 0.50 mmol) in Et<sub>2</sub>O (5 mL) and the resulting mixture was vigorously stirred for 30 min. The solid formed was filtered off under reduced pressure and it was washed with several portions of Et<sub>2</sub>O to give salt **1d** (193 mg, 94%) as a white solid. Melting point = 160-162 °C; <sup>1</sup>H NMR (DMSO-*d*<sub>6</sub>, 300 MHz)  $\delta_{\text{H}}$  = 3.01 (4H, t,  $J$  = 6.0 Hz, 2 x CH<sub>2</sub>), 2.96 (4H, t,  $J$  = 5.8 Hz, 2 x CH<sub>2</sub>), 1.66 (4H, quintet.,  $J$  = 5.9 Hz, 2 x CH<sub>2</sub>); <sup>13</sup>C NMR (DMSO-*d*<sub>6</sub>, 75 MHz)  $\delta_{\text{C}}$  = 159.6 (q, <sup>2</sup> $J_{\text{C-F}}$  = 31 Hz, CF<sub>3</sub>CO<sub>2</sub>), 151.6 (CN<sub>3</sub>), 118.1 (q, <sup>1</sup> $J_{\text{C-F}}$  = 299 Hz, CF<sub>3</sub>CO<sub>2</sub>), 47.4 (CH<sub>2</sub>), 39.1 (CH<sub>2</sub>), 21.7 (CH<sub>2</sub>); <sup>19</sup>F NMR (DMSO-*d*<sub>6</sub>, 282 MHz)  $\delta_{\text{F}}$  = -73.55 (CF<sub>3</sub>); MS (ESI<sup>+</sup>):  $m/z$  (%) = 140 (100) [TBD+H]<sup>+</sup>.

<sup>13</sup>C

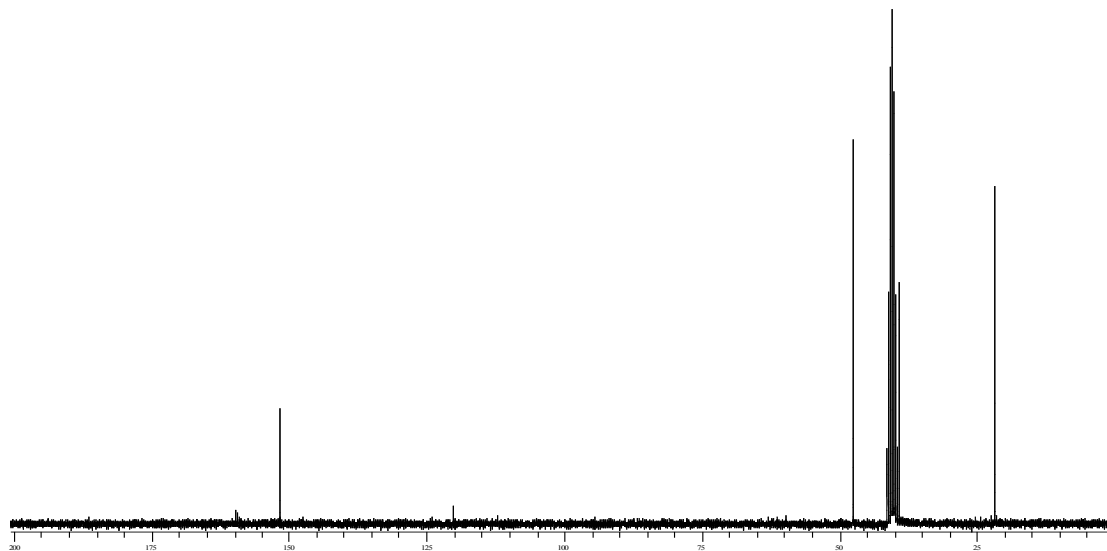

$^1\text{H}$

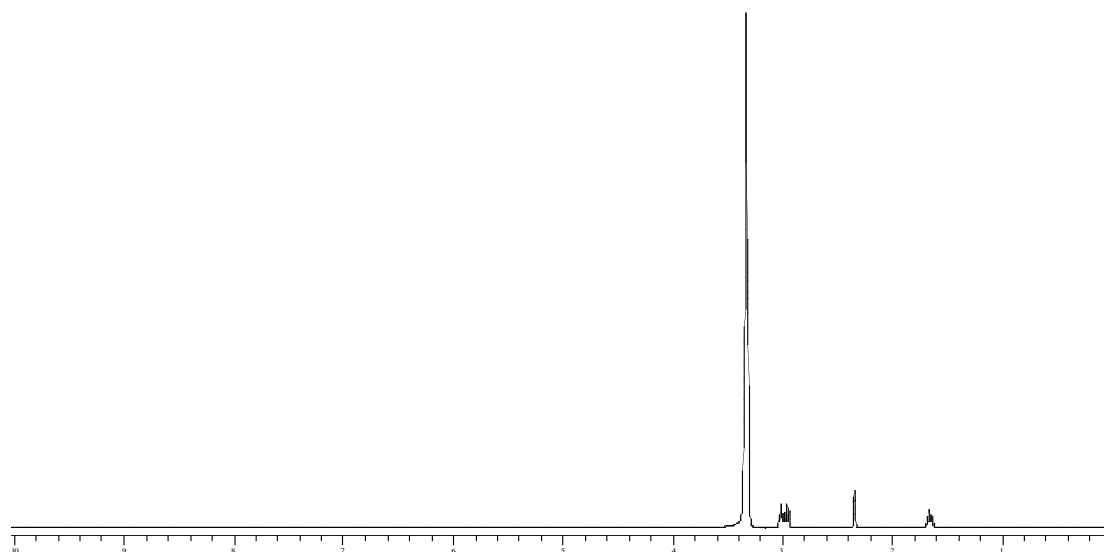

$^{19}\text{F}$

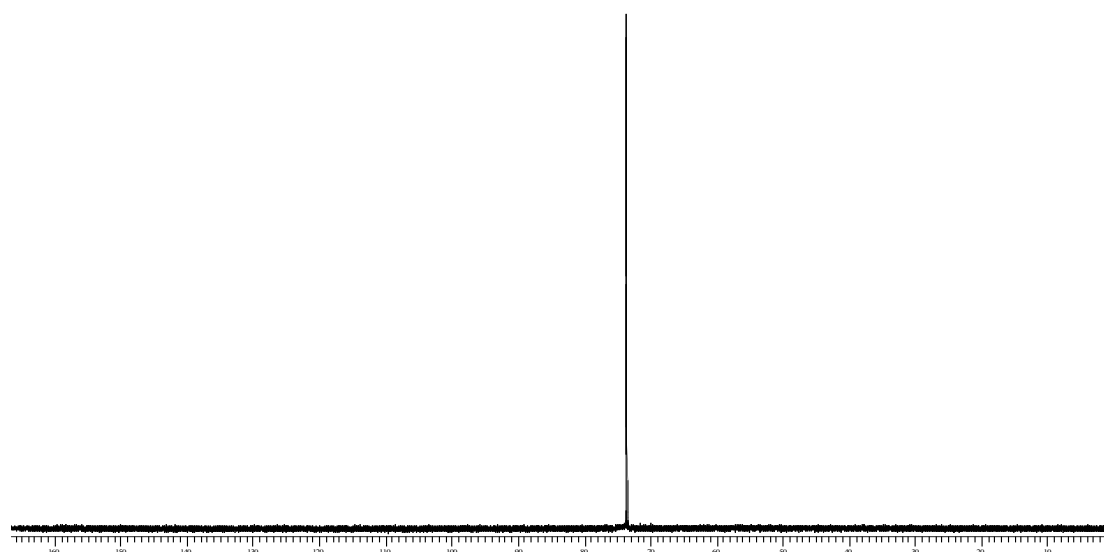

### Tetraphenylborate guanidinium salt (**1b**)

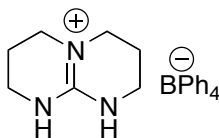

Guanidinium salt **1b** was prepared according to a well-documented literature procedure:

Linton, B.; Hamilton, A.D. *Tetrahedron* **1999**, 55, 6027-6038.

### Chloride guanidinium salt (**1e**)

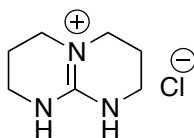

Guanidinium salt **1e** was prepared according to a well-documented literature procedure:

Linton, B.; Hamilton, A.D. *Tetrahedron* **1999**, 55, 6027-6038.

### Standard procedure for the synthesis of aldols 4a-e (SP1)

Tetrafluoroborate guanidinium salt **1a** (9.1 mg, 0.04 mmol), (*S*)-proline (6.9 mg, 0.06 mmol) and solid aldehyde **3a-e** (0.4 mmol) were weighed together inside a screw-capped test tube. Cyclohexanone **2** (393 mg, 0.41 mL, 4.0 mmol) was added to the solid mixture and the resulting suspension, placed on a test tubes grid, was allowed to stay 96 h inside a standard laboratory fridge (temperature fixed at 0-3 °C) without agitation of mechanical stirring. The mixture was then quenched with NH<sub>4</sub>Cl (aq. sat.), extracted with DCM (2 x 15 mL) and the organic liquors dried (MgSO<sub>4</sub>). Solvents and excess of cyclohexanone were eliminated under reduced pressure. Flash chromatography of crude reaction mixtures afforded pure aldols **4a-e**.

### Standard procedure for the synthesis of aldols 4f-h (SP2)

Tetrafluoroborate guanidinium salt **1a** (9.1 mg, 0.04 mmol) and (*S*)-proline (6.9 mg, 0.06 mmol) were weighed together inside a screw-capped test tube. Cyclohexanone **2** (393 mg, 0.41 mL, 4.0 mmol) was added to the solid mixture and finally aldehyde **3f-h** (0.4 mmol), with the aid of a microsyringe. The resulting suspension, placed on a test tubes grid, was transferred to a standard laboratory fridge (temperature fixed at 0-3 °C), where it stayed 96 h without agitation of mechanical stirring. The mixture was then quenched with NH<sub>4</sub>Cl (aq. sat.), extracted with DCM (2 x 15 mL) and the organic liquors dried (MgSO<sub>4</sub>). Solvents and excess of cyclohexanone were eliminated under reduced pressure. Flash chromatography of crude reaction mixtures afforded pure aldols **4f-h**.

### Procedure for the synthesis of aldols 5-7

Similar to standard procedure **SP1**. 10 Equivalents of either 4-methylcyclohexanone, cyclopentanone or 2-propanone are used, respectively, for the synthesis of aldols **5**, **6**, or **7**.

**(S)-2-((R)-hydroxy(4-chlorophenyl)methyl)cyclohexan-1-one (4a)**<sup>ii</sup>

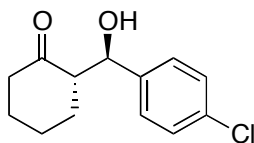

Prepared according to **SP1**. Yellow solid. Purified by flash chromatography (Hex/EtOAc, 3:1). <sup>1</sup>H NMR (300 MHz, CDCl<sub>3</sub>): δ = 7.34-7.29 (2H, m, ArH), 7.27-7.24 (2H, m, ArH), 4.76 (1H, dd, *J* = 8.7, 2.8 Hz, CHOH), 3.98 (1H, d, *J* = 2.8 Hz, OH), 2.60-2.29 (3H, m, CH + CH<sub>2</sub>), 2.14-2.04 (1H, m, CH), 1.82-1.50 (4H, m, 2 x CH<sub>2</sub>), 1.36-1.21 (1H, m, CH); <sup>13</sup>C NMR (75 MHz, CDCl<sub>3</sub>): δ = 215.6 (C=O), 139. (ArC), 133.9 (ArC), 128.9 (2 x ArCH), 128.7 (2 x ArCH), 74.5 (CHOH), 57.7 (CH), 43.0 (CH<sub>2</sub>), 31.1 (CH<sub>2</sub>), 28.1 (CH<sub>2</sub>), 25.1 (CH<sub>2</sub>).

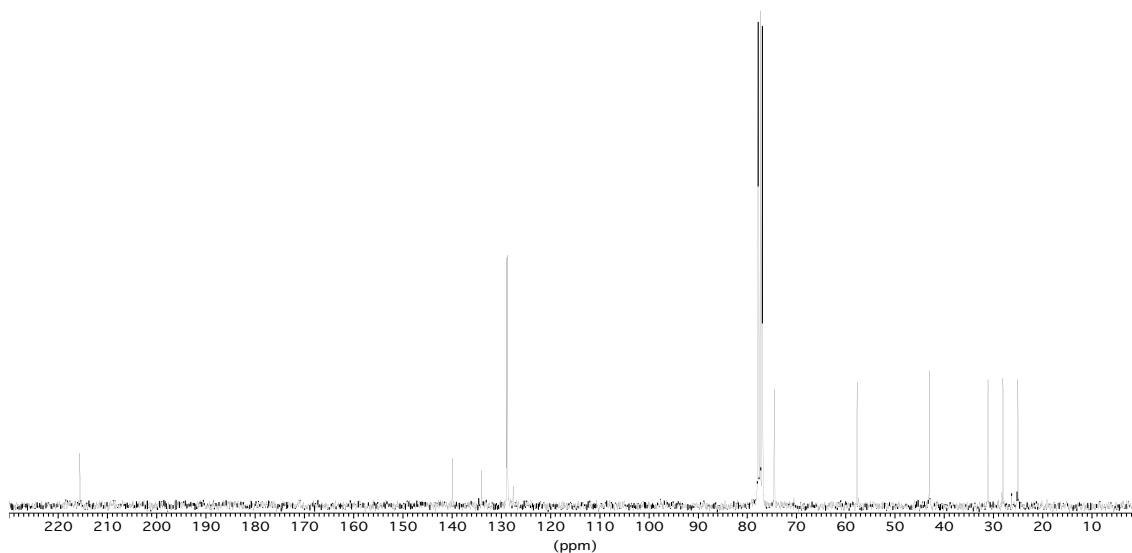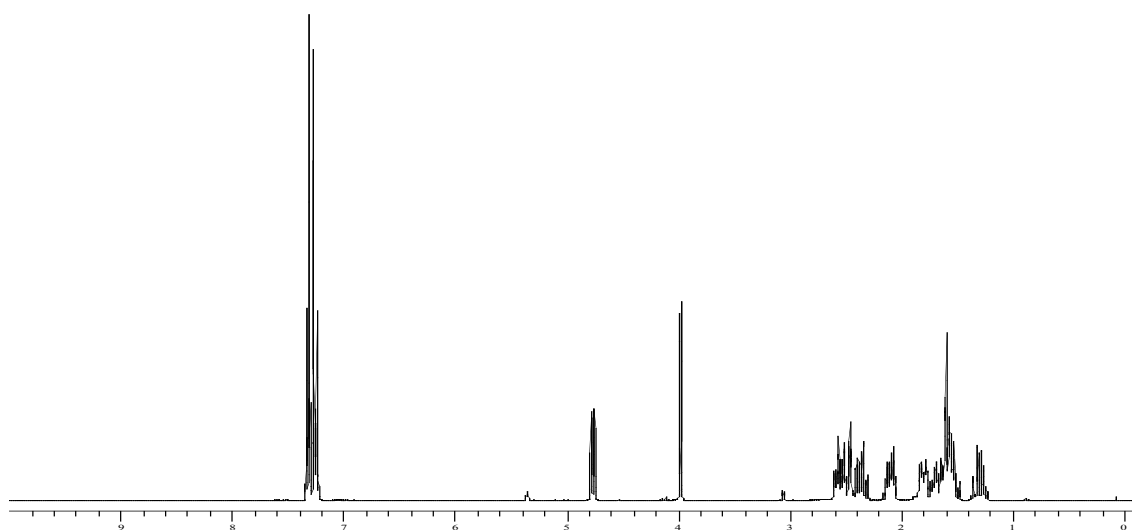

It was obtained in a maximum of 98% *ee*. The optical purity was determined by HPLC on chiralpak AD-H column (hexane/2-propanol 90:10), flow rate 0.5 mL/min,  $\lambda$  220 nm.

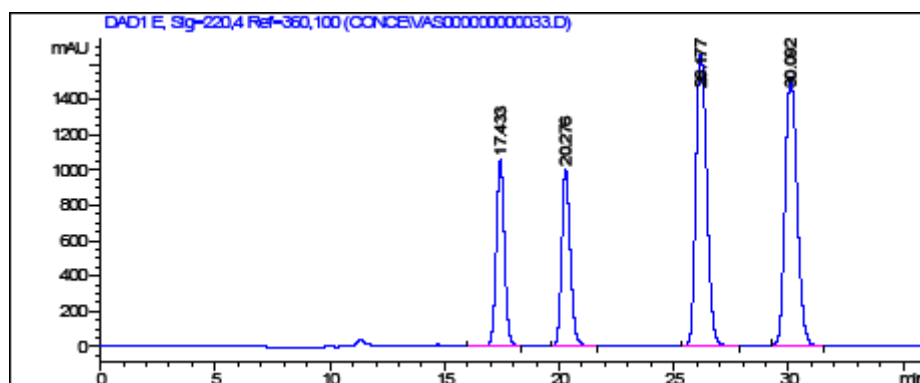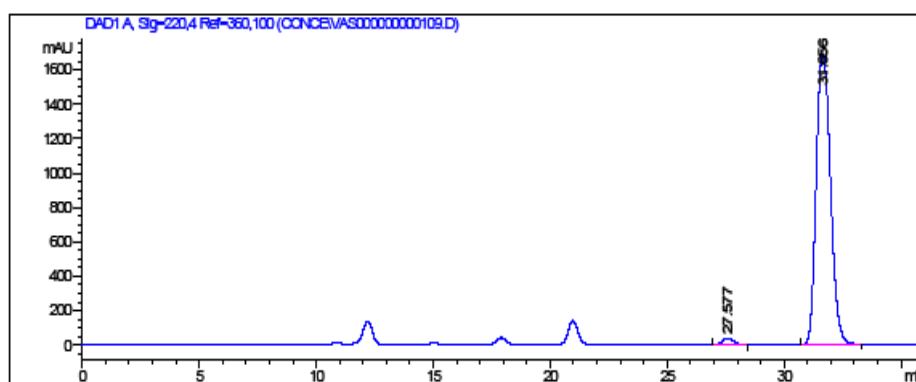

# Area Percent Report

Sorted By : Signal  
Multiplier : 1.0000  
Dilution : 1.0000  
Use Multiplier & Dilution Factor with ISTDs

Signal 1: DAD1 A, Sig-220,4 Ref-360,100

| Peak # | RetTime [min] | Area %  |
|--------|---------------|---------|
| 1      | 27.577        | 0.8914  |
| 2      | 31.656        | 99.1086 |

\*\*\* End of Report \*\*\*

**(S)-2-((R)-hydroxy(4-nitrophenyl)methyl)cyclohexan-1-one (4b)<sup>2</sup>**

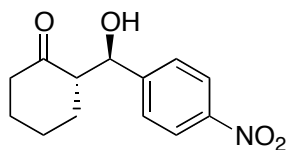

Prepared according to **SP1**. Orangish solid. Purified by flash chromatography (Hex/EtOAc, 3:1). <sup>1</sup>H NMR (300 MHz, CDCl<sub>3</sub>): δ = 8.21-8.18 (2H, m, ArH), 7.52-7.47 (2H, m, ArH), 4.89 (1H, dd, *J* = 8.4, 3.1 Hz, CHOH), 4.07 (1H, d, *J* = 3.1 Hz, OH), 2.63-2.30 (3H, m, CH + CH<sub>2</sub>), 2.15-2.07 (1H, m, CH), 1.85-1.52 (4H, m, 2 x CH<sub>2</sub>), 1.45-1.30 (1H, m, CH); <sup>13</sup>C NMR (75 MHz, CDCl<sub>3</sub>): δ = 215.0 (C=O), 148.7 (ArC), 147.9 (ArC), 128.2 (2 x ArCH), 123.9 (2 x ArCH), 74.3 (CHOH), 57.5 (CH), 43.0 (CH<sub>2</sub>), 31.1 (CH<sub>2</sub>), 28.0 (CH<sub>2</sub>), 25.0 (CH<sub>2</sub>).

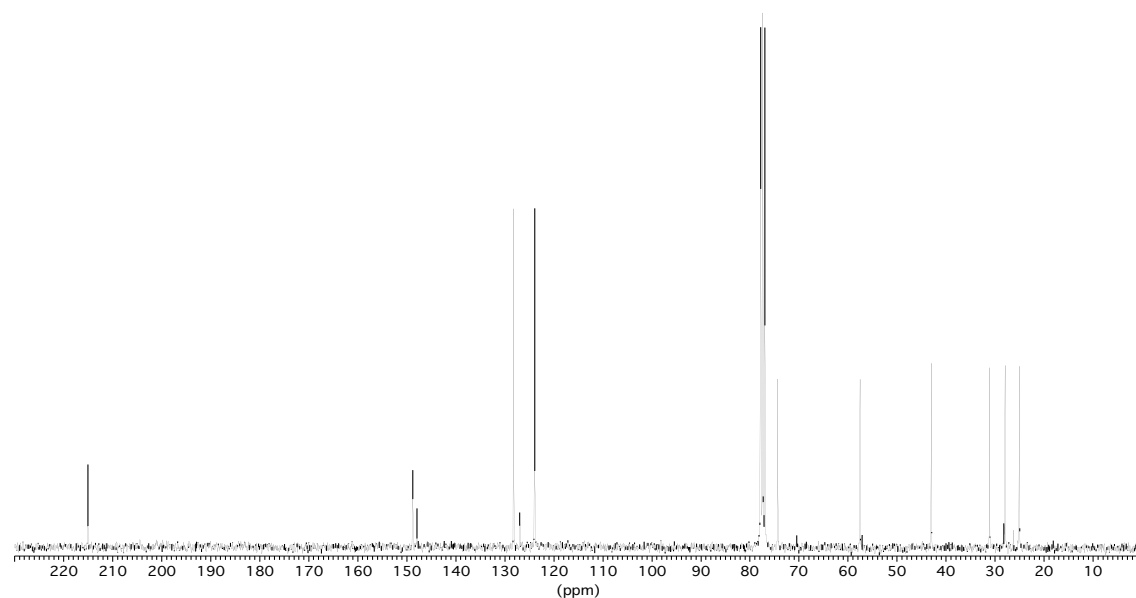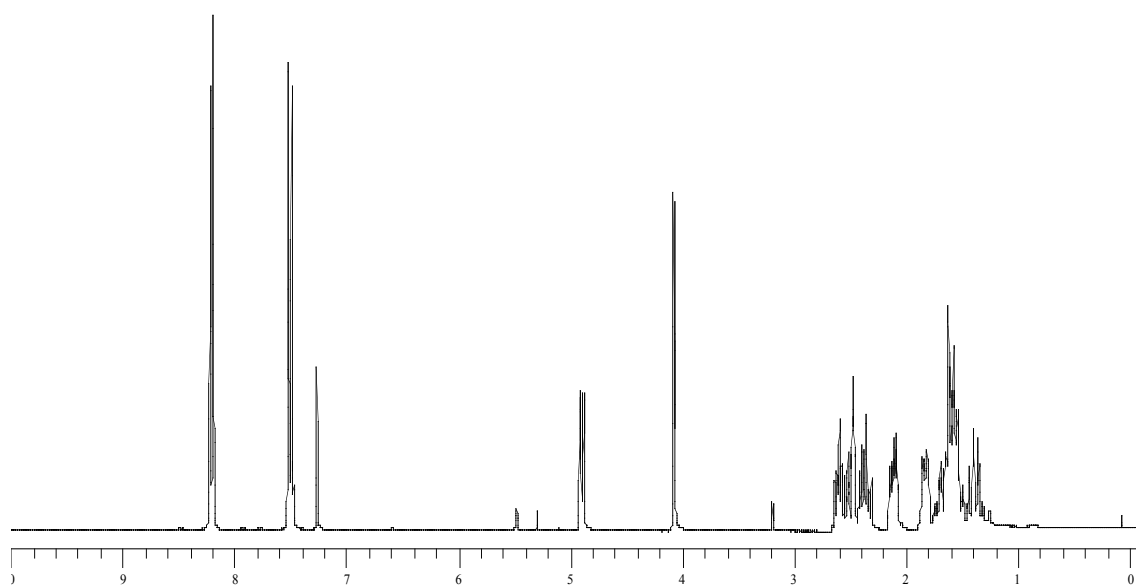

It was obtained in a maximum of 99% *ee*. The optical purity was determined by HPLC on a chiralpak AD-H column (hexane/2-propanol 90:10), flow rate 0.5 mL/min,  $\lambda$  254 nm.

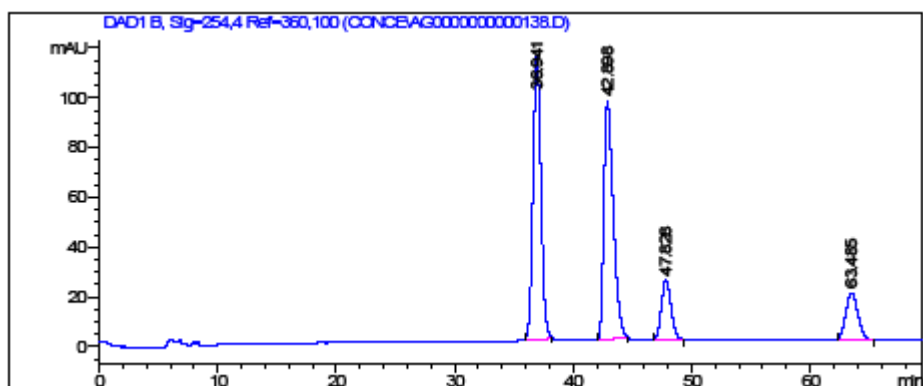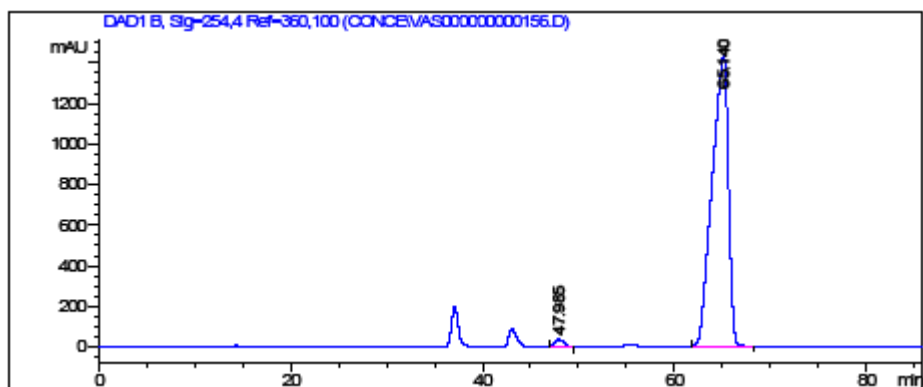

# Area Percent Report

Sorted By : Signal  
Multiplier : 1.0000  
Dilution : 1.0000  
Use Multiplier & Dilution Factor with ISTDs

Signal 1: DAD1 B, Sig=254,4 Ref=360,100

| Peak # | RetTime [min] | Area %  |
|--------|---------------|---------|
| 1      | 47.985        | 0.4986  |
| 2      | 65.140        | 99.5014 |

\*\*\* End of Report \*\*\*

**(S)-2-((R)-hydroxy(4-methoxycarbonylphenyl)methyl)cyclohexan-1-one (4c)<sup>2</sup>**

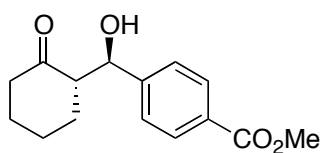

Prepared according to **SP1**. Yellow solid. Purified by flash chromatography (Hex/EtOAc, 3:1). <sup>1</sup>H NMR (300 MHz, CDCl<sub>3</sub>): δ = 8.02-7.99 (2H, m, ArH), 7.40-7.37 (2H, m, ArH), 4.84 (1H, d, *J* = 8.5 Hz, CHOH), 4.01 (1H, s, CHOH), 3.90 (3H, t, *J* = 0.6 Hz, CO<sub>2</sub>CH<sub>3</sub>), 2.64-2.29 (3H, m, CH + CH<sub>2</sub>), 2.12-2.03 (1H, m, CHH), 1.81-1.51 (4H, m, 2 x CH<sub>2</sub>), 1.37-1.24 (1H, m, CHH); <sup>13</sup>C NMR (75 MHz, CDCl<sub>3</sub>): δ = 215.4 (C=O), 167.2 (CO<sub>2</sub>), 146.4 (ArC), 130.0 (2 x ArCH), 127.4 (2 x ArCH), 126.1 (ArC), 74.7 (CHOH), 57.6 (CH), 52.4 (CO<sub>2</sub>CH<sub>3</sub>), 43.0 (CH<sub>2</sub>), 31.1 (CH<sub>2</sub>), 28.0 (CH<sub>2</sub>), 25.0 (CH<sub>2</sub>).

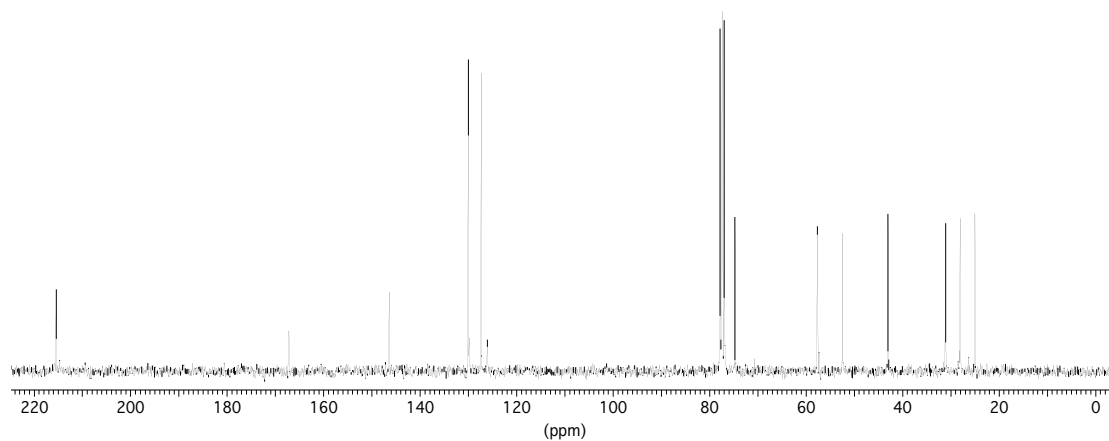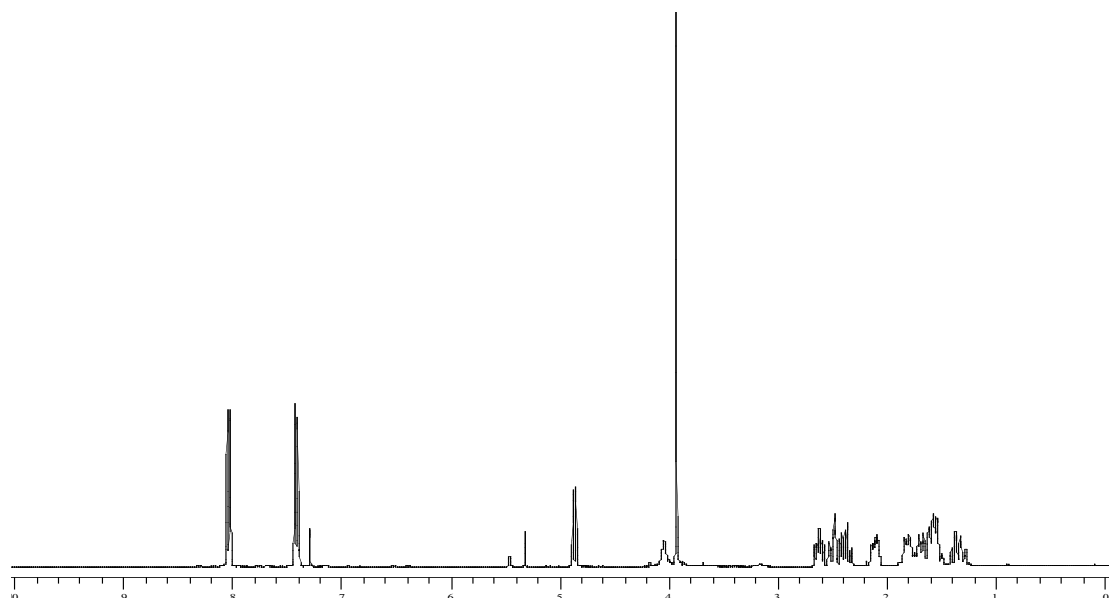

It was obtained in a maximum of 99% *ee*. The optical purity was determined by HPLC on a chiralpak OD-H column (hexane/2-propanol 98:2), flow rate 1.0 mL/min,  $\lambda$  240 nm.

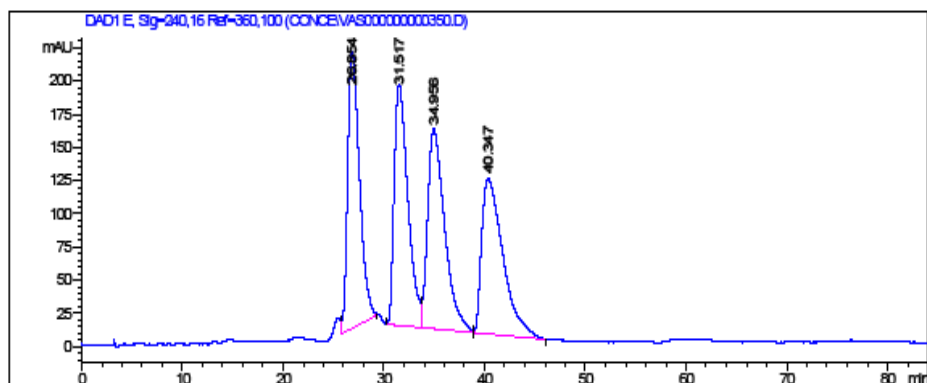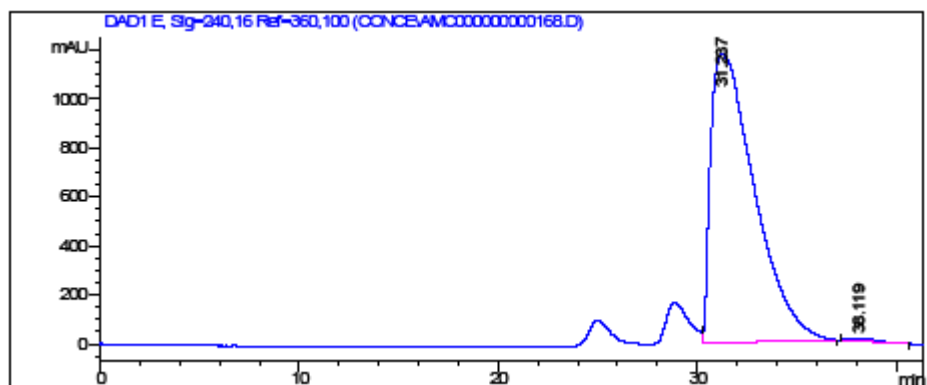

# Area Percent Report

Sorted By : Signal  
Multiplier : 1.0000  
Dilution : 1.0000  
Use Multiplier & Dilution Factor with ISTDs

Signal 1: DAD1 E, Sig-240,16 Ref-360,100

| Peak # | RetTime [min] | Area %  |
|--------|---------------|---------|
| 1      | 31.237        | 99.4751 |
| 2      | 38.119        | 0.5249  |

\*\*\* End of Report \*\*\*

**(S)-2-((R)-hydroxy(4-bromophenyl)methyl)cyclohexan-1-one (4d)<sup>2</sup>**

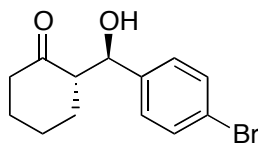

Prepared according to **SP1**. Yellow solid. Purified by flash chromatography (Hex/EtOAc, 3:1). <sup>1</sup>H NMR (300 MHz, CDCl<sub>3</sub>): δ = 7.49-7.45 (2H, m, ArH), 7.21-7.18 (2H, m, ArH), 4.75 (1H, d, *J* = 8.7 Hz, CHOH), 3.97 (1H, s, OH), 2.59-2.29 (3H, m, CH + CH<sub>2</sub>), 2.13-2.05 (1H, m, CHH), 1.83-1.47 (4H, m, 2 x CH<sub>2</sub>), 1.36-1.22 (1H, m, CHH); <sup>13</sup>C NMR (75 MHz, CDCl<sub>3</sub>): δ = 215.4 (C=O), 140.3 (ArC), 131.7 (2 x ArCH), 129.0 (2 x ArCH), 122.0 (ArC), 74.4 (CHOH), 57.6 (CH), 43.0 (CH<sub>2</sub>), 31.0 (CH<sub>2</sub>), 28.0 (CH<sub>2</sub>), 25.0 (CH<sub>2</sub>).

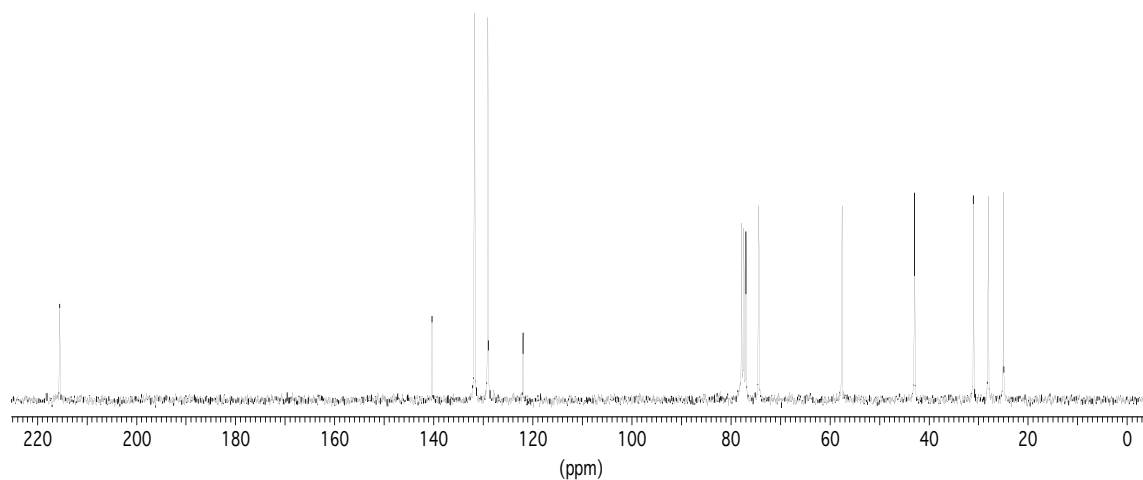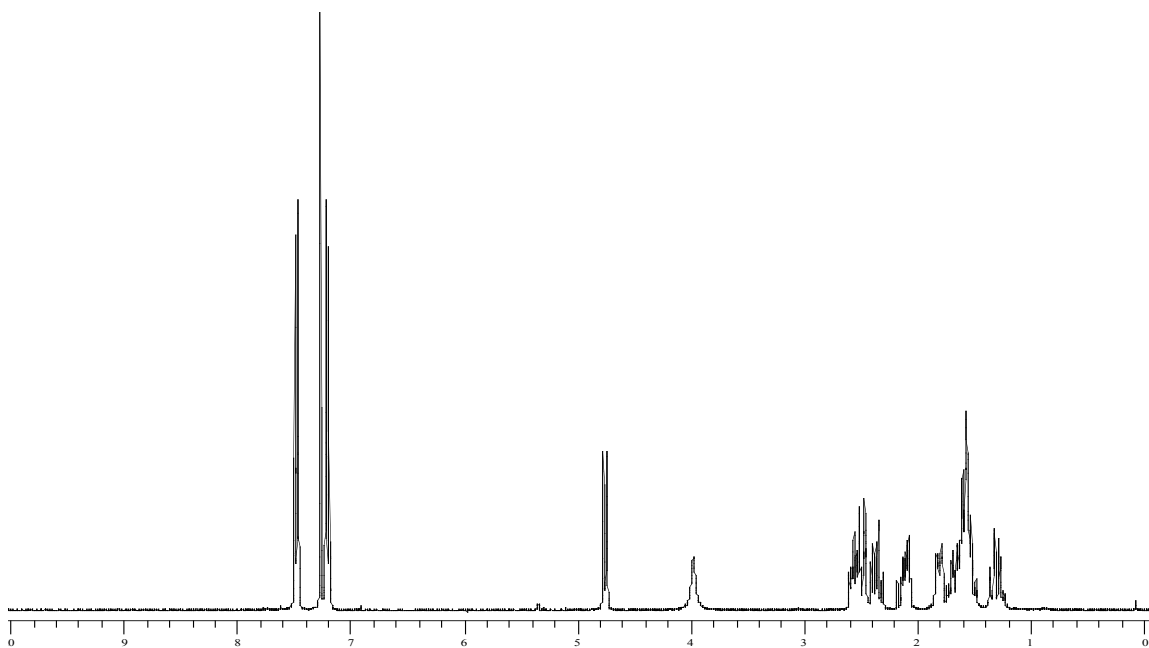

It was obtained in a maximum of 99% *ee*. The optical purity was determined by HPLC on a chiralpak AD-H column (hexane/2-propanol 90:10), flow rate 0.5 mL/min,  $\lambda$  220 nm.

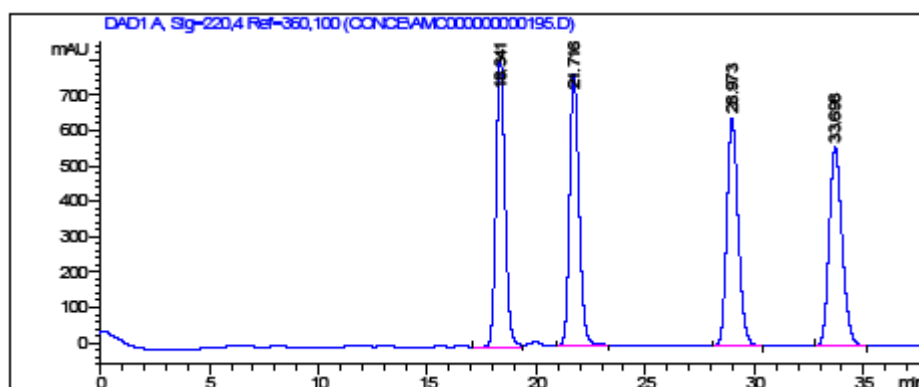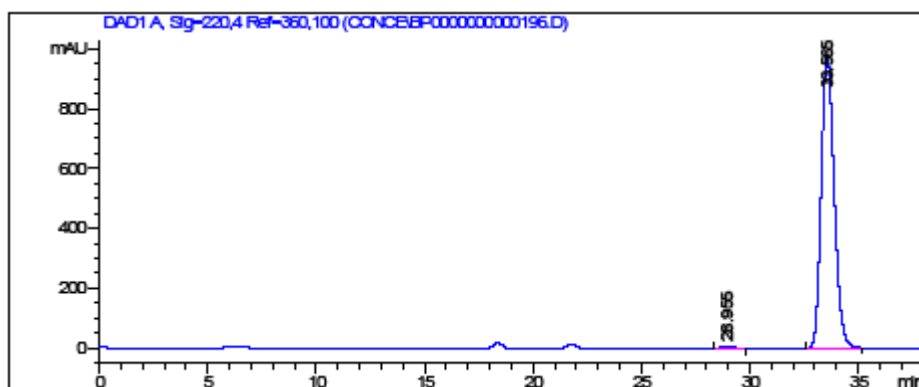

# Area Percent Report

Sorted By : Signal  
Multiplier : 1.0000  
Dilution : 1.0000  
Use Multiplier & Dilution Factor with ISTDs

Signal 1: DAD1 A, Sig-220,4 Ref-360,100

| Peak # | RetTime [min] | Area %  |
|--------|---------------|---------|
| 1      | 28.955        | 0.7077  |
| 2      | 33.565        | 99.2923 |

\*\*\* End of Report \*\*\*

**(S)-2-((R)-hydroxy(2-methoxyphenyl)methyl)cyclohexan-1-one (4e)<sup>iii</sup>**

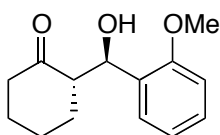

Prepared according to **SP1**. Yellow solid. Purified by flash chromatography (Hex/EtOAc, 3:1). <sup>1</sup>H NMR (300 MHz, CDCl<sub>3</sub>): δ = 7.41-7.38 (1H, m, ArH), 7.28-7.22 (1H, m, ArH), 7.00-6.95 (1H, m, ArH), 6.88-6.85 (1H, m, ArH), 5.26 (1H, dd, *J* = 8.5, 4.6 Hz, CHOH), 3.83 (1 H, s, OH), 3.81 (3 H, s, OCH<sub>3</sub>), 2.77-2.69 (1 H, m, CH), 2.49-2.29 (2 H, m, CH<sub>2</sub>), 2.08-2.01 (1 H, m, CH), 1.81-1.42 (5 H, m, CH + (2 x CH<sub>2</sub>)); <sup>13</sup>C NMR (75 MHz, CDCl<sub>3</sub>): δ = 215.9 (C=O), 157.1 (ArC), 130.0 (ArC), 128.9 (ArCH), 128.1 (ArCH), 121.2 (ArCH), 110.8 (ArCH), 68.9 (CHOH), 57.6 (CH), 55.7 (OCH<sub>3</sub>), 42.9 (CH<sub>2</sub>), 30.8 (CH<sub>2</sub>), 28.3 (CH<sub>2</sub>), 25.0 (CH<sub>2</sub>).

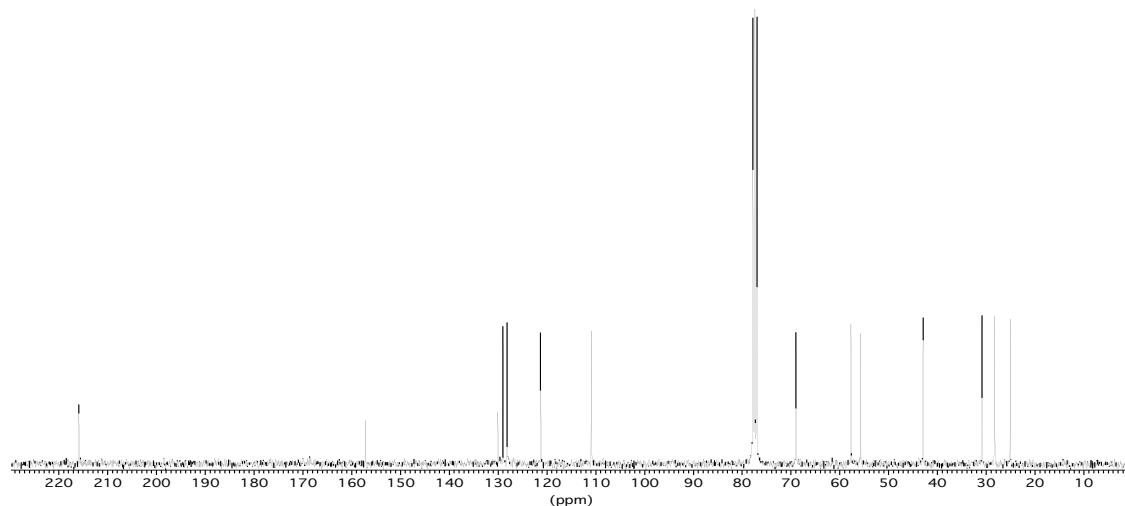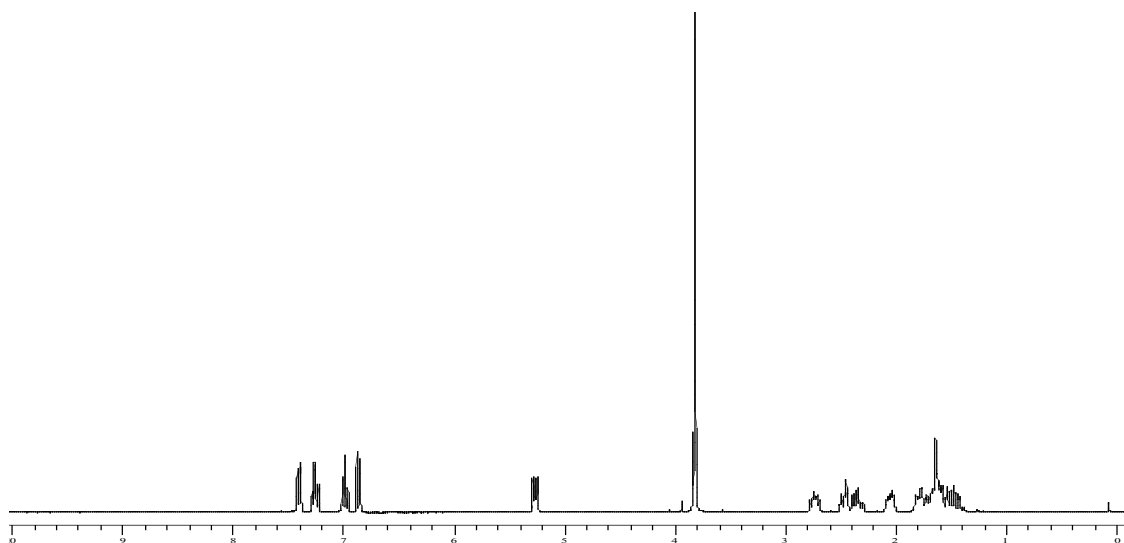

It was obtained in a maximum of 98% *ee*. The optical purity was determined by HPLC on a chiralcel OD column (hexane/2-propanol 95:5), flow rate 1.0 mL/min,  $\lambda$  210 nm.

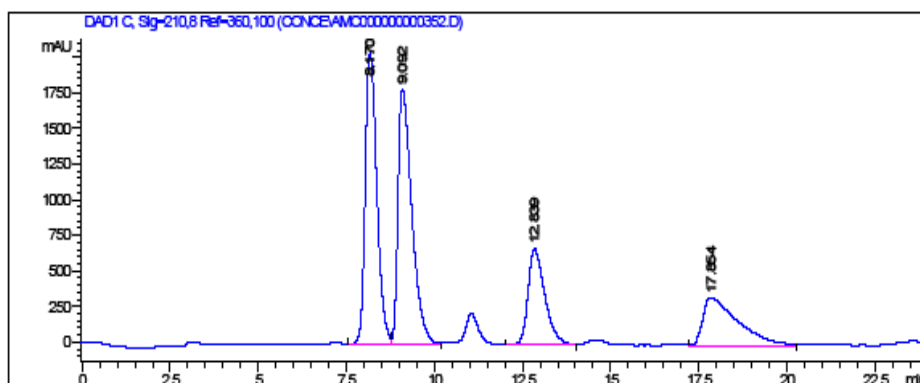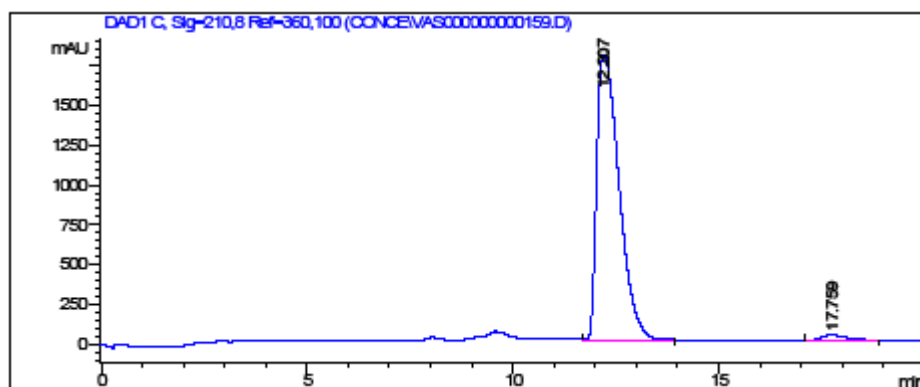

# Area Percent Report

Sorted By : Signal  
Multiplier : 1.0000  
Dilution : 1.0000  
Use Multiplier & Dilution Factor with ISDS

Signal 1: DAD1 C, Sig-210,8 Ref-360,100

| Peak # | RetTime [min] | Area %  |
|--------|---------------|---------|
| 1      | 12.207        | 98.9537 |
| 2      | 17.759        | 1.0463  |

\*\*\* End of Report \*\*\*

**(S)-2-((R)-hydroxy(3-chlorophenyl)methyl)cyclohexan-1-one (4f)**<sup>3</sup>

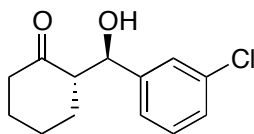

Prepared according to **SP2**. White solid. Purified by flash chromatography (Hex/EtOAc, 3:1).

<sup>1</sup>H NMR (300 MHz, CDCl<sub>3</sub>):  $\delta$  = 7.34-7.17 (4H, m, ArH), 4.76 (1H, dd,  $J$  = 1.89, 8.7 Hz, CHOH), 4.06 (1H, d,  $J$  = 1.74 Hz, CHOH), 2.63-2.30 (3H, m, CH + CH<sub>2</sub>), 2.11-2.04 (1H, m, CHH), 1.82-1.52 (4H, m, 2 x CH<sub>2</sub>), 1.37-1.23 (1H, m, CHH); <sup>13</sup>C NMR (75 MHz, CDCl<sub>3</sub>):  $\delta$  = 215.3 (C=O), 143.4 (ArC), 134.5 (ArC), 129.8 (ArCH), 128.2 (ArCH), 127.4 (ArCH), 125.5 (ArCH), 74.4 (CHOH), 57.5 (CH), 42.8 (CH<sub>2</sub>), 31.0 (CH<sub>2</sub>), 27.9 (CH<sub>2</sub>), 24.9 (CH<sub>2</sub>).

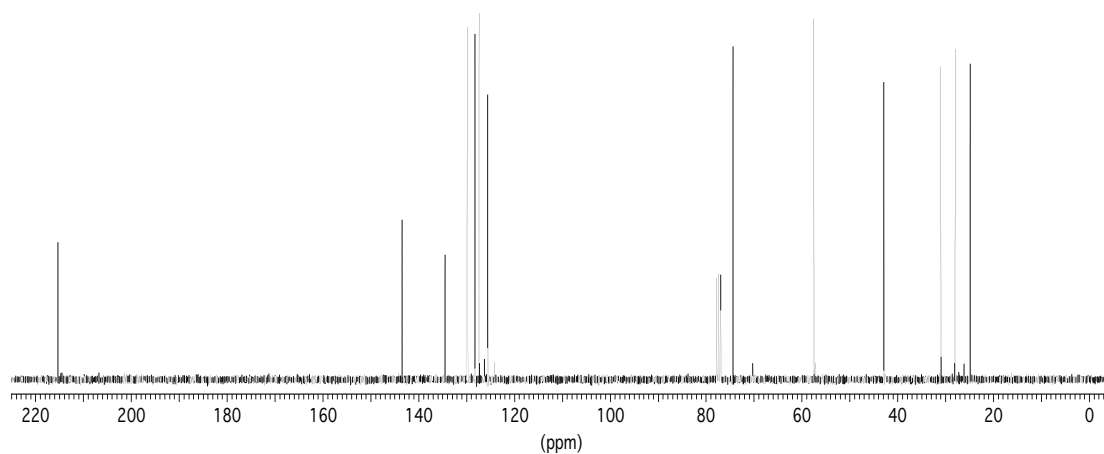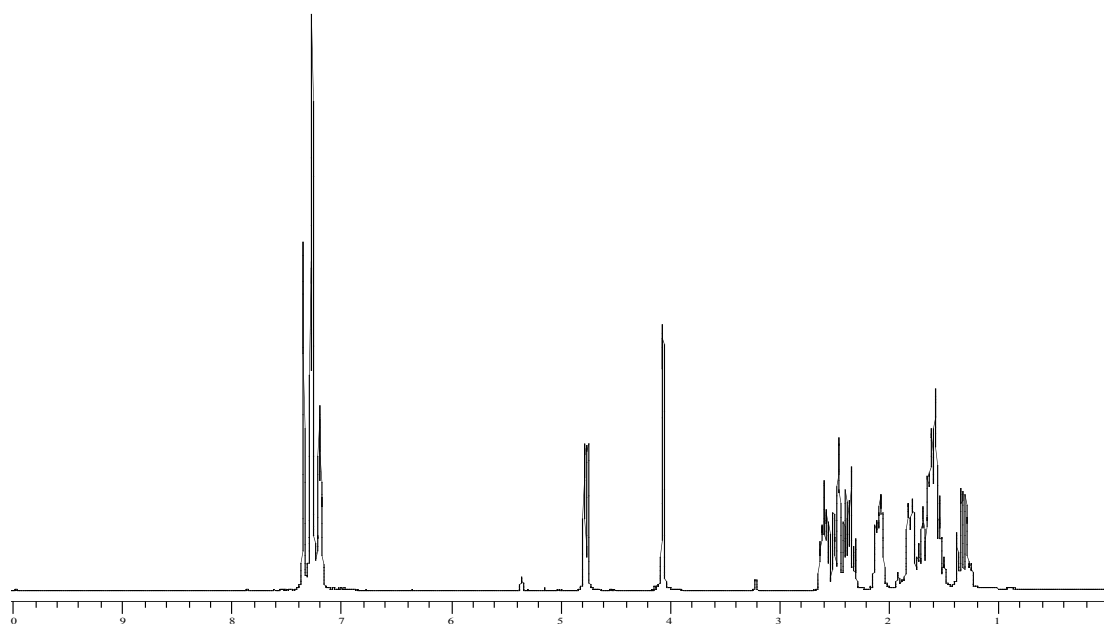

It was obtained in a maximum of 98% *ee*. The optical purity was determined by HPLC on a chiralcel OD column (hexane/2-propanol 98:2), flow rate 1.0 mL/min,  $\lambda$  220 nm.

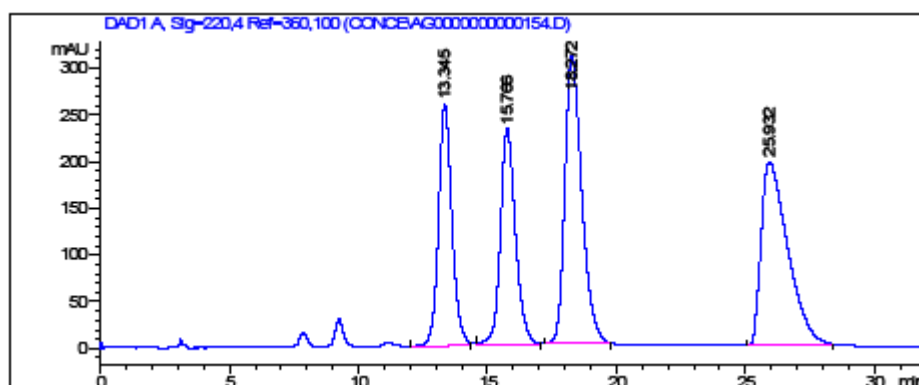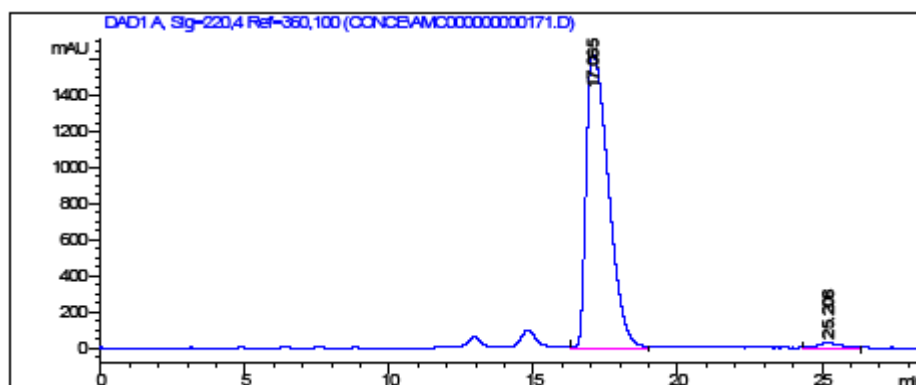

# Area Percent Report

Sorted By : Signal  
Multiplier : 1.0000  
Dilution : 1.0000  
Use Multiplier & Dilution Factor with ISTDs

Signal 1: DAD1 A, Sig-220,4 Ref-360,100

| Peak # | RetTime [min] | Area %  |
|--------|---------------|---------|
| 1      | 17.065        | 99.1506 |
| 2      | 25.208        | 0.8494  |

\*\*\* End of Report \*\*\*

**(S)-2-((R)-hydroxy(2-furyl)methyl)cyclohexan-1-one (4g)<sup>iv</sup>**

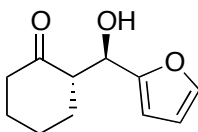

Prepared according to **SP2**. Yellow solid. Purified by flash chromatography (Hex/EtOAc, 3:1). <sup>1</sup>H NMR (300 MHz, CDCl<sub>3</sub>): δ = 7.37-7.32 (1H, m, ArH), 6.32-6.25 (2H, m, ArH), 4.82 (1H, dd, *J* = 8.3, 3.6 Hz, CHOH), 3.88 (1H, d, *J* = 3.8 Hz, OH), 2.95-2.77 (1H, m, CH), 2.49-2.30 (2H, m, CH<sub>2</sub>), 2.13-2.05 (1H, m, CHH), 1.86-1.56 (4H, m, 2 x CH<sub>2</sub>), 1.42-1.24 (1H, m, CHH); <sup>13</sup>C NMR (75 MHz, CDCl<sub>3</sub>): δ = 215.2 (C=O), 154.0 (ArC), 142.6 (ArCH), 110.4 (ArCH), 108.2 (ArCH), 68.5 (CHOH), 55.2 (CH), 42.9 (CH<sub>2</sub>), 30.9 (CH<sub>2</sub>), 28.1 (CH<sub>2</sub>), 25.0 (CH<sub>2</sub>).

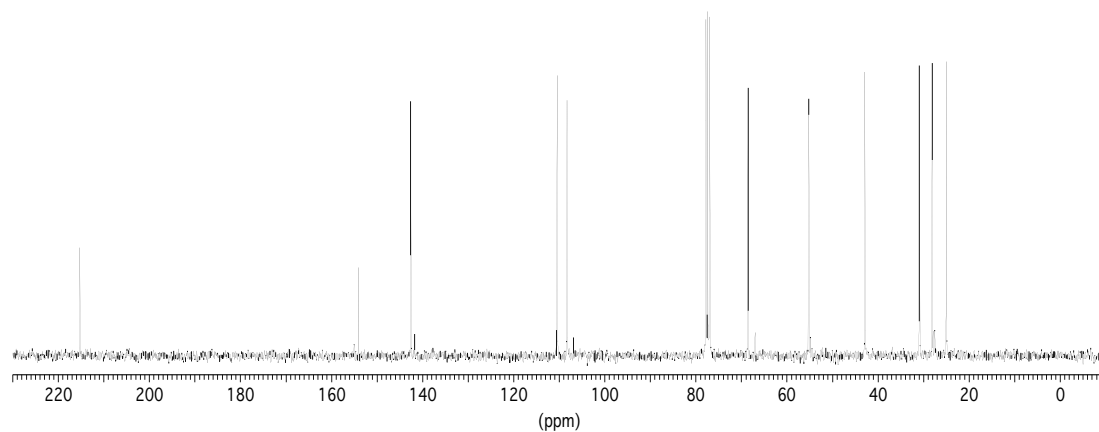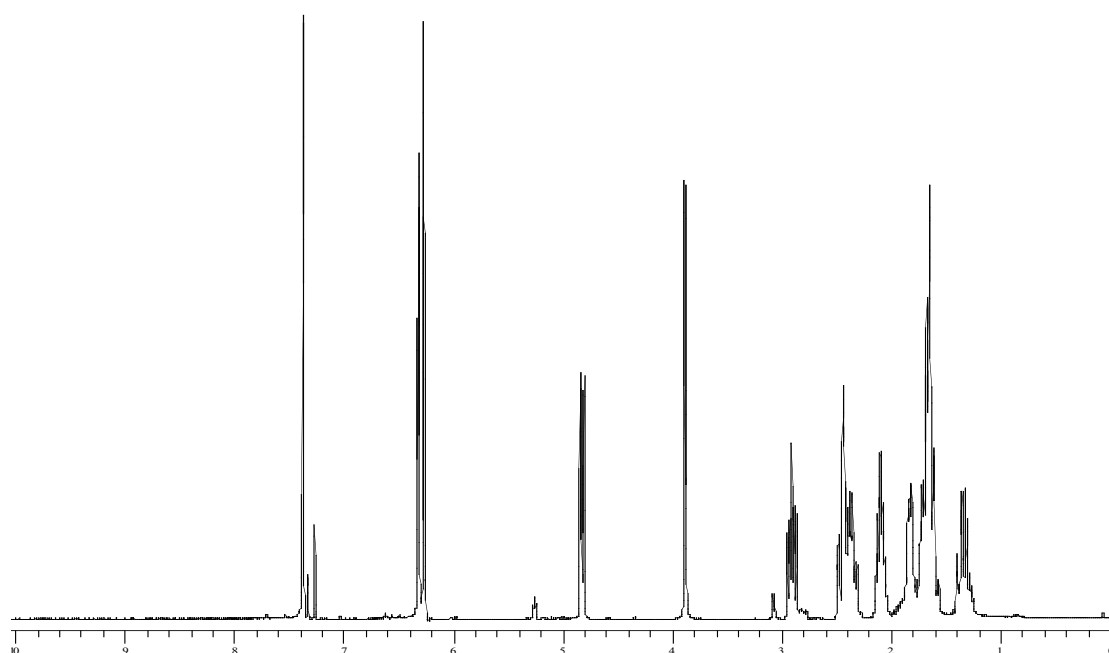

It was obtained in a maximum of 91% ee. The optical purity was determined by HPLC on a chiralpak AD-H column (hexane/2-propanol 90:10), flow rate 1.0 mL/min,  $\lambda$  210 nm.

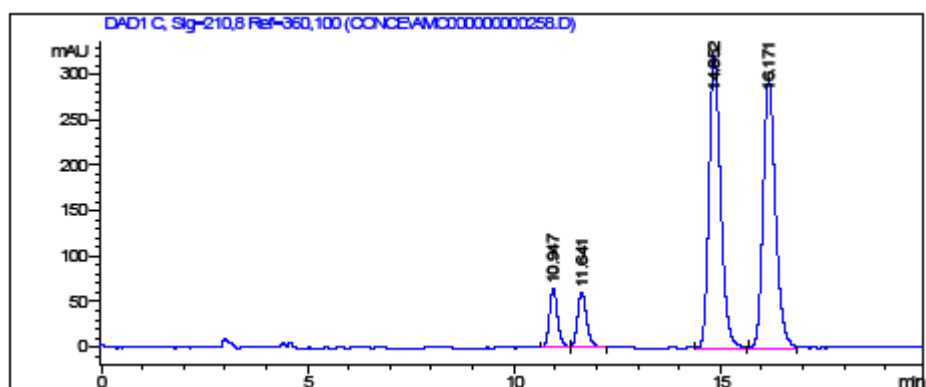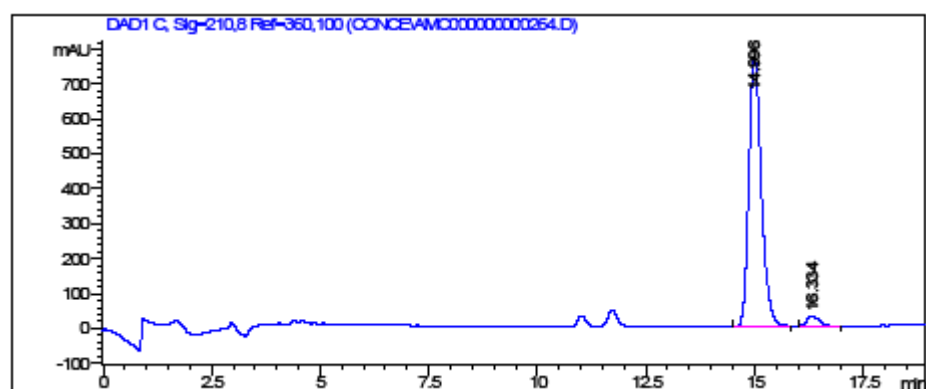

# Area Percent Report

Sorted By : Signal  
Multiplier : 1.0000  
Dilution : 1.0000  
Use Multiplier & Dilution Factor with ISTDs

Signal 1: DAD1 C, Sig-210,8 Ref-360,100

| Peak # | RetTime [min] | Area %  |
|--------|---------------|---------|
| 1      | 14.996        | 95.4712 |
| 2      | 16.334        | 4.5289  |

\*\*\* End of Report \*\*\*

**(S)-2-((R)-hydroxy(2-thiophenyl)methyl)cyclohexan-1-one (4h)**<sup>4</sup>

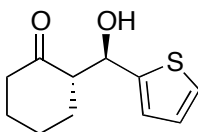

Prepared according to **SP2**. Yellow oil. Purified by flash chromatography (Hex/EtOAc, 3:1).

<sup>1</sup>H NMR (300 MHz, CDCl<sub>3</sub>):  $\delta$  = 7.28-7.21 (1H, m, ArH), 6.99-6.91 (2H, m, ArH), 5.08 (1H, dd,  $J$  = 8.4, 3.0 Hz, CHOH), 4.12 (1H, d,  $J$  = 3.2 Hz, OH), 2.70-2.61 (1H, m, CH), 2.50-2.30 (2H, m, CH<sub>2</sub>), 2.15-2.06 (1H, m, CHH), 1.86-1.54 (4H, m, 2 x CH<sub>2</sub>), 1.41-1.26 (1H, m, CHH); <sup>13</sup>C NMR (75 MHz, CDCl<sub>3</sub>):  $\delta$  = 215.2 (C=O), 145.0 (ArC-S), 126.6 (ArCH-S), 125.4 (ArCH), 125.3 (ArCH), 71.0 (CHOH), 58.1 (CH), 42.9 (CH<sub>2</sub>), 31.1 (CH<sub>2</sub>), 28.0 (CH<sub>2</sub>), 25.0 (CH<sub>2</sub>).

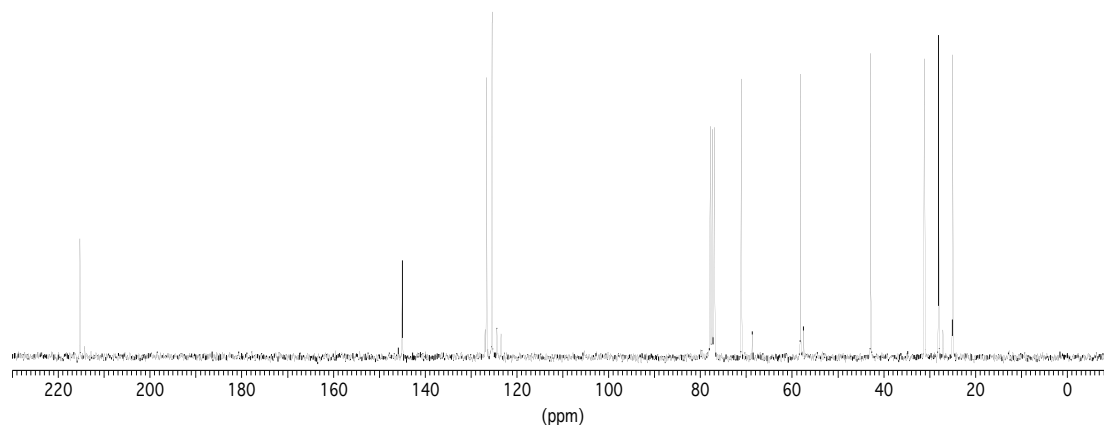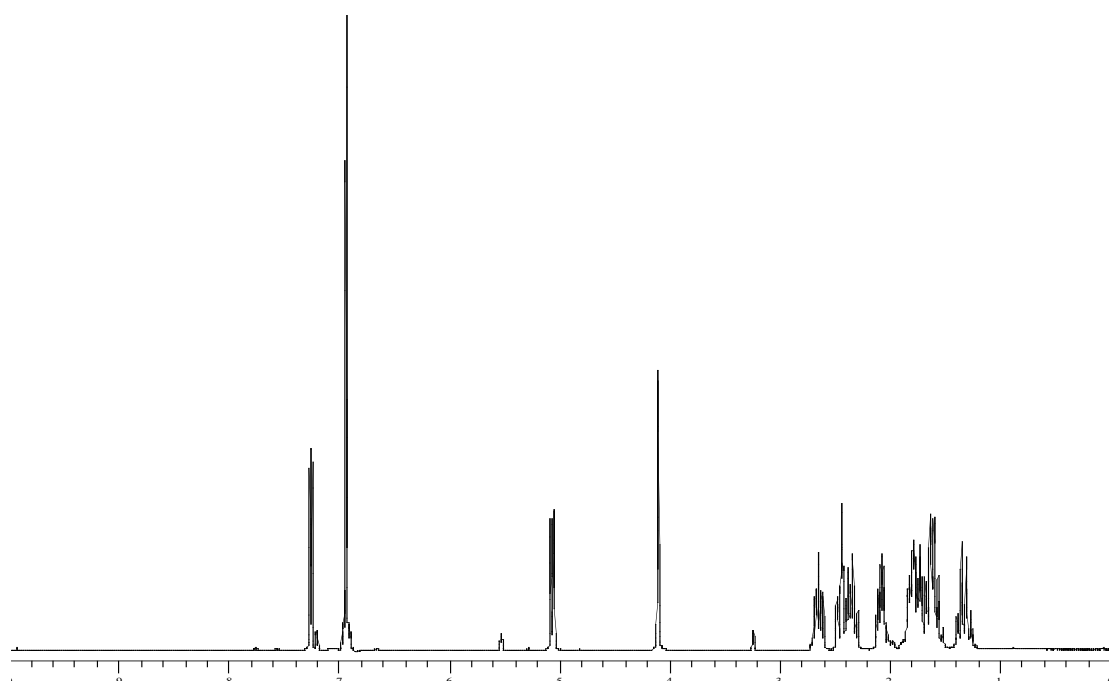

It was obtained in a maximum of 90% *ee*. The optical purity was determined by HPLC on a chiralpak AD-H column (hexane/2-propanol 90:10), flow rate 1.0 mL/min,  $\lambda$  230 nm.

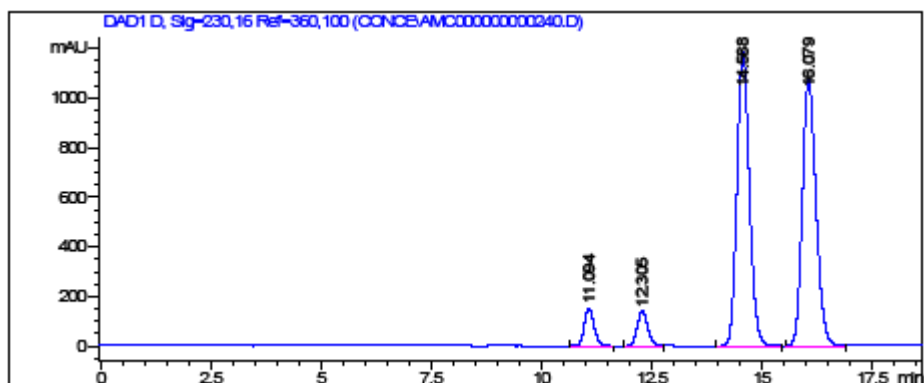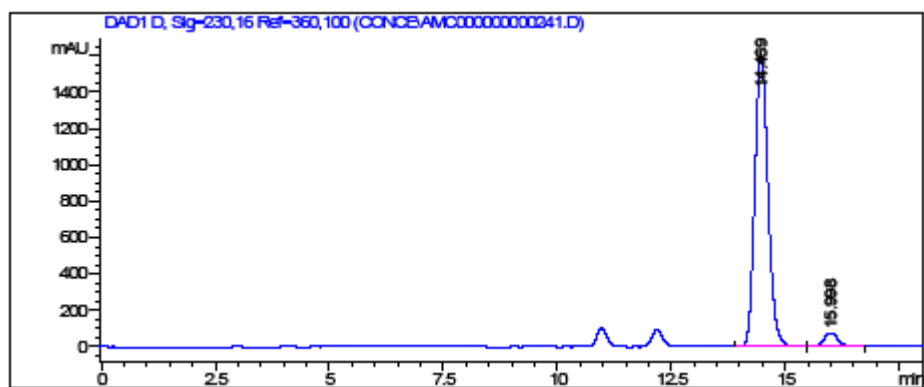

# Area Percent Report

Sorted By : Signal  
Multiplier : 1.0000  
Dilution : 1.0000  
Use Multiplier & Dilution Factor with ISTDs

Signal 1: DAD1 D, Sig-230,16 Ref-360,100

| Peak # | RetTime [min] | Area %  |
|--------|---------------|---------|
| 1      | 14.469        | 94.9704 |
| 2      | 15.998        | 5.0296  |

\*\*\* End of Report \*\*\*

**((2*S*,4*S*)-2-((*R*)-hydroxy(4-nitrophenyl)methyl)-4-methylcyclohexanone (5)<sup>v</sup>**

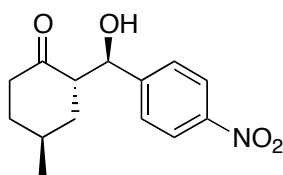

Yellow solid. Purified by flash chromatography (Hex/EtOAc, 3:1). <sup>1</sup>H NMR (CDCl<sub>3</sub>, 300 MHz)  $\delta$  = 8.22 (2H, d,  $J$  = 8.7 Hz, ArCH), 7.51 (2H, d,  $J$  = 8.7 Hz, ArCH), 4.92 (1H, dd,  $J$  = 8.5, 2.5 Hz, CHOH), 3.90 (1H, d,  $J$  = 2.5 Hz, OH), 2.78-2.70 (1H, m, CH), 2.60-2.49 (1H, m, CH), 2.43-2.35 (1H, m, CH), 2.11-2.04 (1H, m, CH), 2.00-1.88 (1H, m, CH), 1.88-1.74 (1H, m, CH), 1.65-1.55 (1H, m, CH), 1.36-1.25 (1H, m, CH), 1.06 (3H, d,  $J$  = 7.0 Hz, CH<sub>3</sub>); <sup>13</sup>C NMR (CDCl<sub>3</sub>, 75 MHz)  $\delta$  = 215.3 (C=O), 148.7 (ArC), 148.0 (ArC), 128.2 (ArCH), 124.0 (ArCH), 74.5 (CHOH), 53.2 (CH), 38.5 (CH<sub>2</sub>), 36.4 (CH), 33.2 (CH<sub>2</sub>), 27.0 (CH<sub>2</sub>), 18.5 (CH<sub>3</sub>).

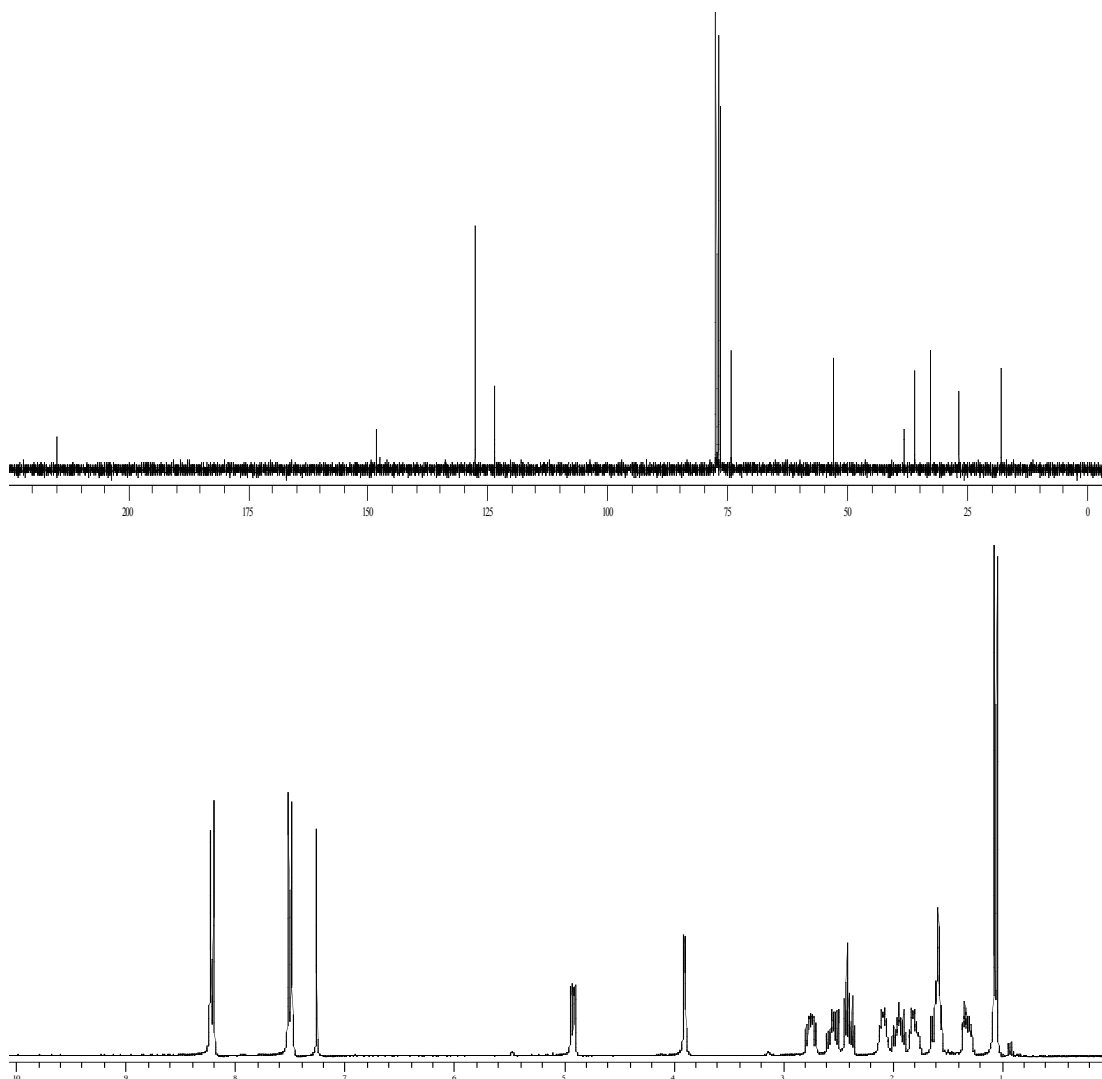

It was obtained in a maximum of 97% *ee*. The optical purity was determined by HPLC on a chiralpak AD-H column (hexane/2-propanol 85:15), flow rate 1.0 mL/min,  $\lambda$  254 nm.

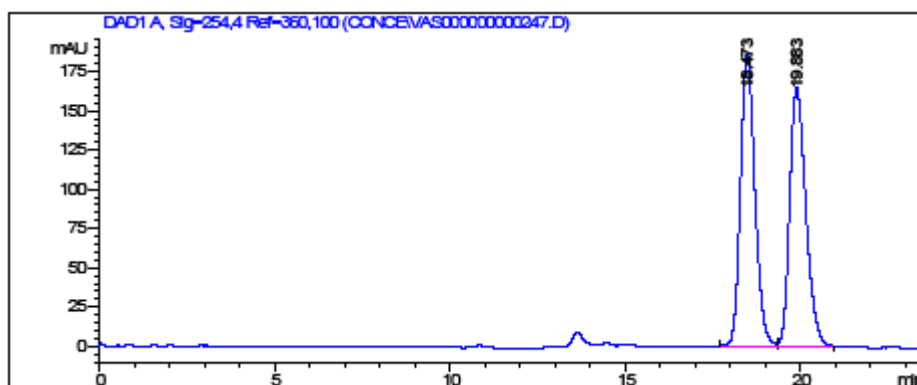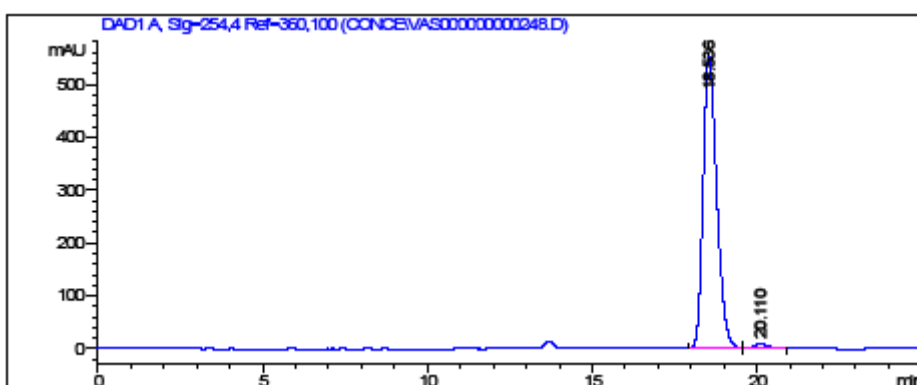

#### Area Percent Report

Sorted By : Signal  
Multiplier : 1.0000  
Dilution : 1.0000  
Use Multiplier & Dilution Factor with ISTDs

Signal 1: DAD1 A, Sig-254,4 Ref-360,100

| Peak # | RetTime [min] | Area %  |
|--------|---------------|---------|
| 1      | 18.536        | 98.5206 |
| 2      | 20.110        | 1.4794  |

\*\*\* End of Report \*\*\*

**(S)-2-((R)-hydroxy(4-nitrophenyl)methyl)cyclopentan-1-one (6)<sup>2</sup>**

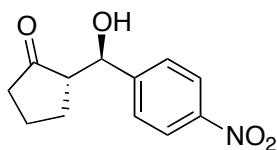

Yellow solid. Purified by flash chromatography (Hex/EtOAc, 3:1). <sup>1</sup>H NMR (CDCl<sub>3</sub>, 300 MHz)  $\delta$  = 8.21 (2H, d,  $J$  = 8.7 Hz, ArCH), 7.52 (2H, d,  $J$  = 8.7 Hz, ArCH), 5.43 (1H, d,  $J$  = 2.9 Hz, CHOH), 2.55-1.63 (7H, m, CH + 3 x CH<sub>2</sub>); <sup>13</sup>C NMR (CDCl<sub>3</sub>, 75 MHz)  $\delta$  = 219.8 (C=O), 150.4 (ArC), 127.7 (ArC), 126.7 (ArCH), 124.0 (ArCH), 70.9 (CHOH), 56.4 (CH), 39.3 (CH<sub>2</sub>), 22.8 (CH<sub>2</sub>), 20.7 (CH<sub>2</sub>).

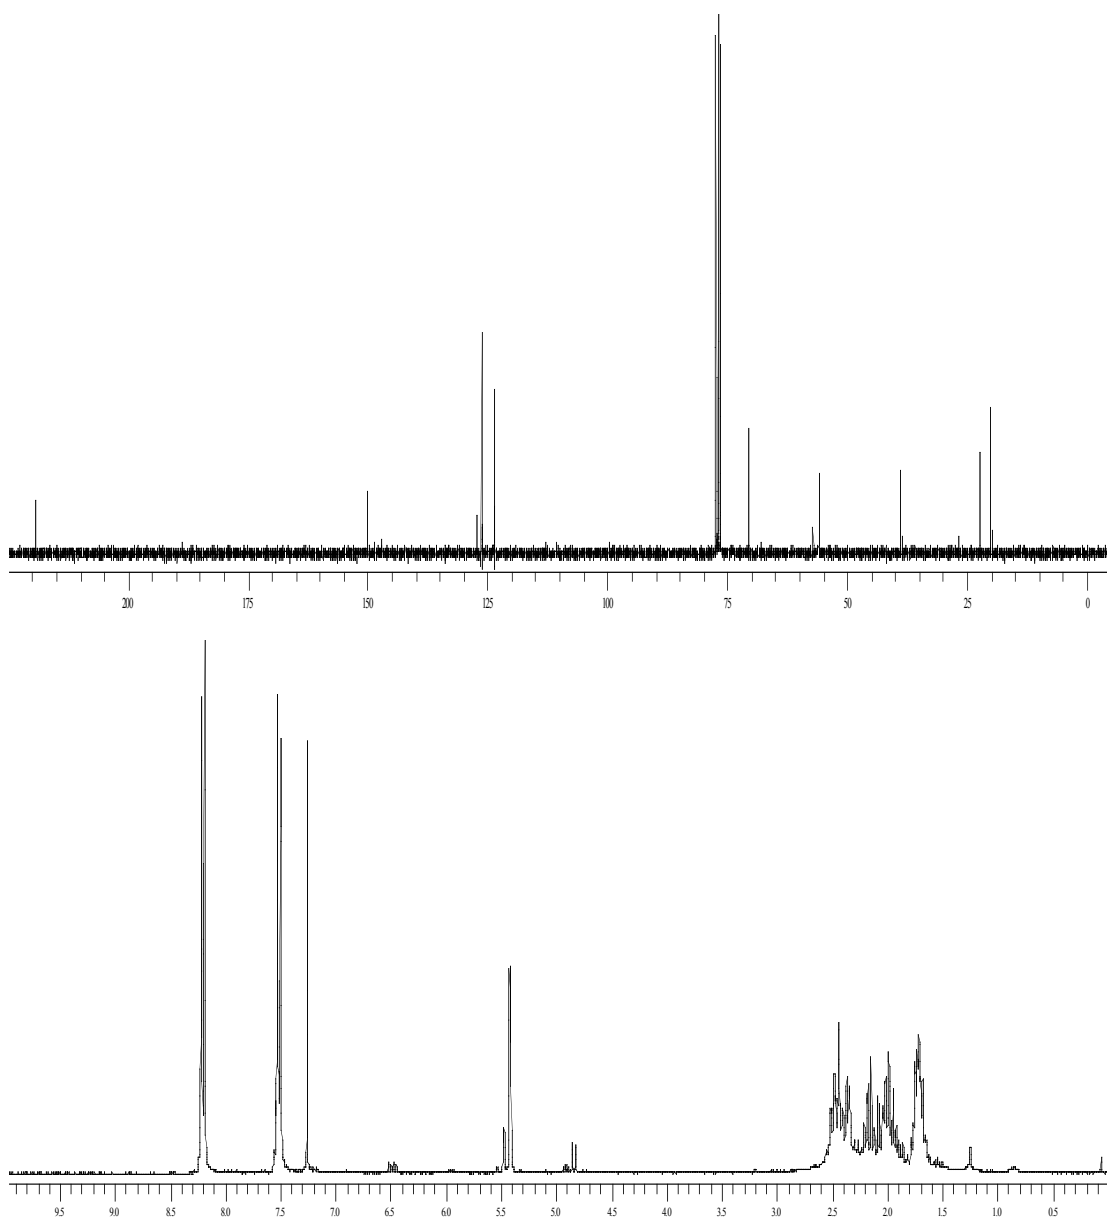

It was obtained in a maximum of 98% *ee*. The optical purity was determined by HPLC on a chiralpak AD-H column (hexane/2-propanol 95:5), flow rate 0.5 mL/min,  $\lambda$  254 nm.

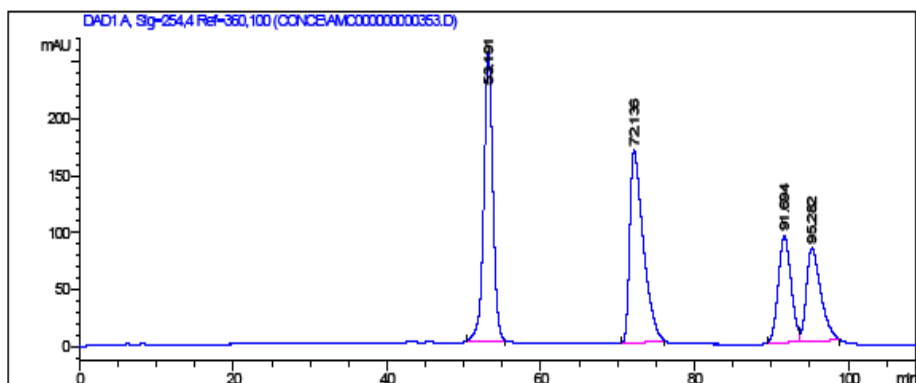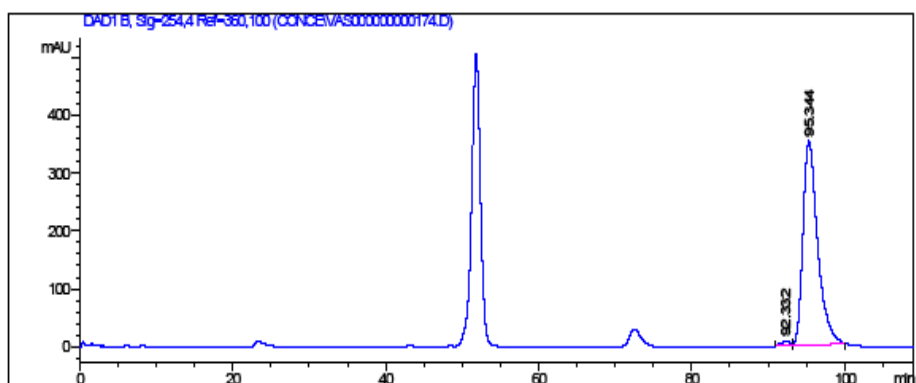

# Area Percent Report

Sorted By : Signal  
Multiplier : 1.0000  
Dilution : 1.0000  
Use Multiplier & Dilution Factor with ISDS

Signal 1: DAD1 B, Sig-254,4 Ref-360,100

| Peak # | RetTime [min] | Area %  |
|--------|---------------|---------|
| 1      | 92.332        | 1.1297  |
| 2      | 95.344        | 98.8703 |

\*\*\* End of Report \*\*\*

**(*R*)-4-hydroxy-4-(4-nitrophenyl)butan-2-one (7)<sup>2</sup>**

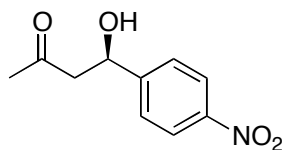

Orangish solid. Purified by flash chromatography (Hex/EtOAc, 3:1). <sup>1</sup>H NMR (300 MHz, CDCl<sub>3</sub>): δ = 8.21-8.17 (2H, m, ArH), 7.55-7.51 (2H, m, ArH), 5.26 (1H, dd, *J* = 7.3, 5.2 Hz, CHOH), 3.54 (1H, s, CHOH), 2.86-2.83 (2H, m, CH<sub>2</sub>), 2.21 (3H, s, CH<sub>3</sub>); <sup>13</sup>C NMR (75 MHz, CDCl<sub>3</sub>): δ = 208.8 (C=O), 150.3 (ArC), 147.7 (ArC), 126.7 (2 x ArCH), 124.1 (2 x ArCH), 69.2 (CHOH), 51.8 (CH<sub>2</sub>), 31.0 (CH<sub>3</sub>).

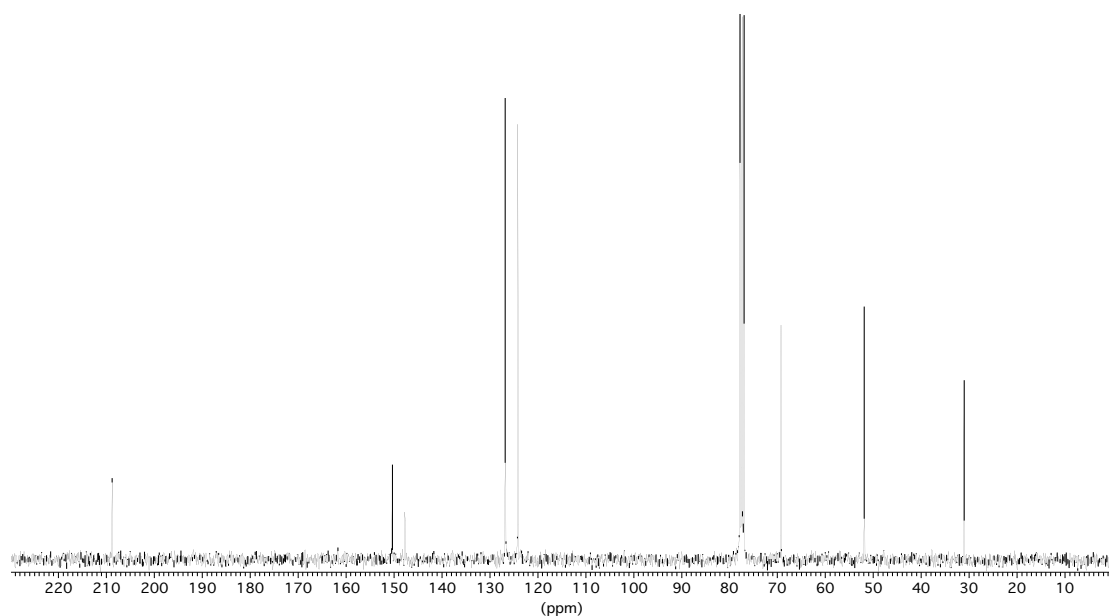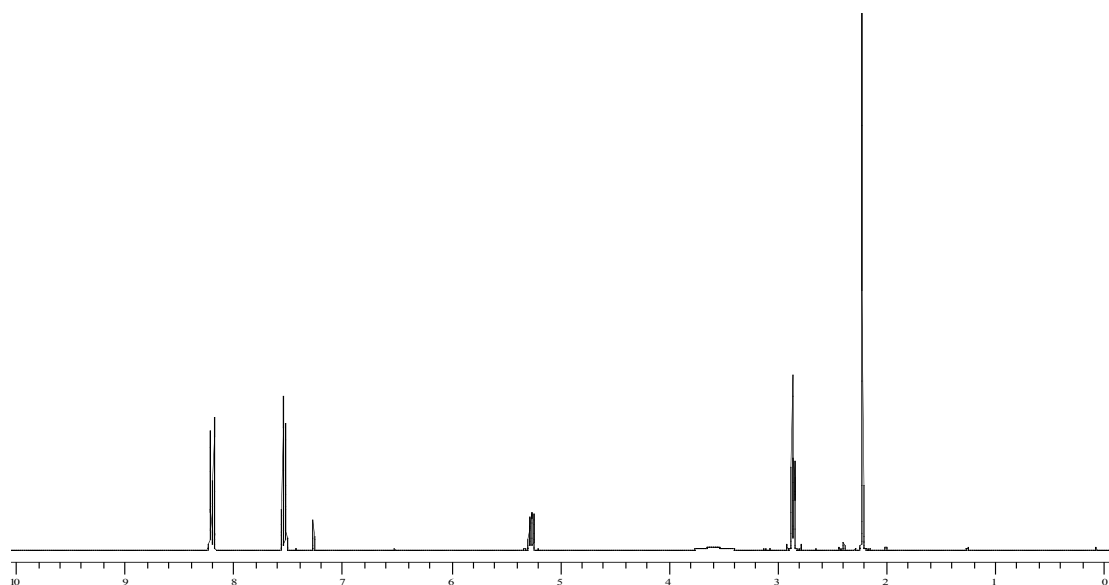

It was obtained in a maximum of 74% *ee*. The optical purity was determined by HPLC on a chiralpak AD-H column (hexane/2-propanol 90:10), flow rate 1.0 mL/min,  $\lambda$  254 nm, on the corresponding *O*-acetyl product derivative.

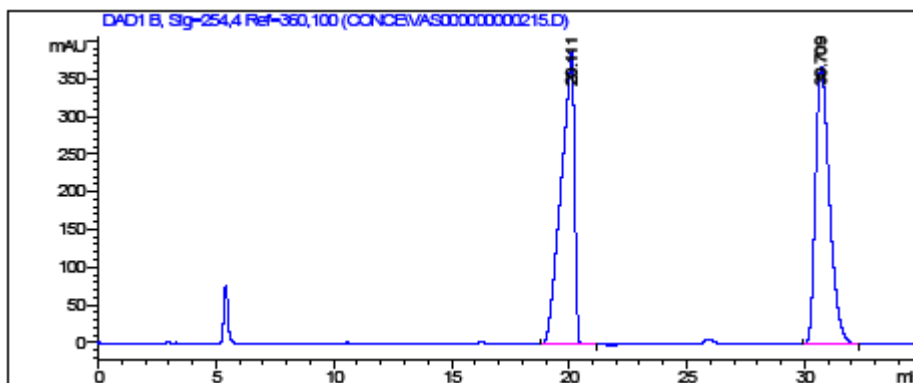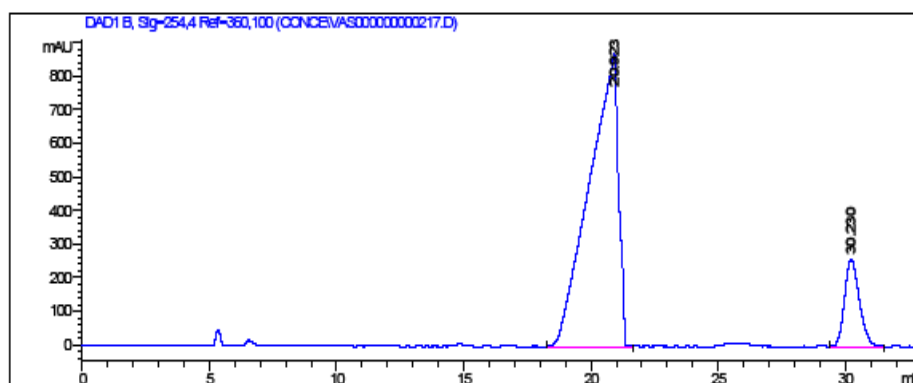

# Area Percent Report

Sorted By : Signal  
Multiplier : 1.0000  
Dilution : 1.0000  
Use Multiplier & Dilution Factor with ISTDs

Signal 1: DAD1 B, Sig-254,4 Ref-360,100

| Peak # | RetTime [min] | Area %  |
|--------|---------------|---------|
| 1      | 20.923        | 86.7976 |
| 2      | 30.230        | 13.2024 |

\*\*\* End of Report \*\*\*

Overview of the results obtained in the **direct aldol reaction without the addition of guanidinium salt 1a**:

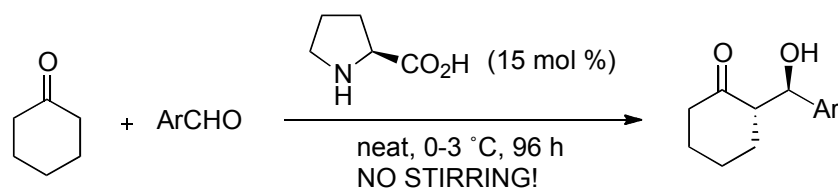

| entry          | ArCHO                            | product   | conv % <sup>a</sup> | anti/syn <sup>a</sup> | ee % <sup>b</sup> |
|----------------|----------------------------------|-----------|---------------------|-----------------------|-------------------|
| 1              | <b>3a</b> 4-ClPh                 | <b>4a</b> | 81                  | 69:31                 | 54                |
| 2              | <b>3b</b> 4-NO <sub>2</sub> Ph   | <b>4b</b> | >99                 | 85:15                 | n.d. <sup>c</sup> |
| 3              | <b>3c</b> 4-CO <sub>2</sub> MePh | <b>4c</b> | 56                  | 76:24                 | 95                |
| 4              | <b>3d</b> 4-BrPh                 | <b>4d</b> | 26                  | 69:31                 | 94                |
| 5 <sup>d</sup> | <b>3b</b> 4-NO <sub>2</sub> Ph   | <b>6</b>  | 93                  | 38:62                 | 92                |

General conditions: ketone (4.0 mmol), ArCHO (0.4 mmol), (*S*)-proline (15 mol %), no solvent, reaction mixture was left to stand 96 h inside a standard laboratory fridge (0-3 °C) with no stirring. <sup>a</sup> Determined by <sup>1</sup>H NMR spectroscopy from crude reaction mixtures. <sup>b</sup> Enantiomeric excess of anti diastereoisomer, as determined by chiral HPLC on crude reaction mixtures. <sup>c</sup> Enantiomeric excess not described. Impurity hampered appropriate HPLC measure. <sup>d</sup> Cyclopentanone was used as ketone.

<sup>i</sup> Gottlieb, H.E.; Kotlyar, V.; Nudelman, A. *J. Org. Chem.* **1997**, *62*, 7512.

<sup>ii</sup> Mase, N.; Nakai, Y.; Ohara, N.; Yoda, H.; Takabe, K.; Tanaka, F.; Barbas III, C.F. *J. Am. Chem. Soc.* **2006**, *128*, 734.

<sup>iii</sup> Li, Z.-Y.; Chen, J.-W.; Wang, L.; Pan, Y. *Synlett* **2009**, 2365.

<sup>iv</sup> Yang, Y.; He, Y.-H.; Guan, Z.; Huang, W.-D. *Adv. Synth. Catal.* **2010**, *14-15*, 2578.

<sup>v</sup> Companyó, X.; Valero, G.; Crovetto, L.; Moyano, A.; Rios, R. *Chem. Eur. J.* **2009**, *15*, 6564.
